1     **The adenosine analogue prodrug ATV006 is orally bioavailable and has potent**  
2                   **preclinical efficacy against SARS-CoV-2 and its variants**

3

4     Liu Cao<sup>1,#</sup>, Yingjun Li<sup>2,#,\*</sup>, Sidi Yang<sup>1,#</sup>, Guanguan Li<sup>2,3,#</sup>, Qifan Zhou<sup>2,#</sup>, Jing Sun<sup>4</sup>,  
5     Tiefeng Xu<sup>1</sup>, Yujian Yang<sup>2</sup>, Tiaozhen Zhu<sup>2</sup>, Siyao Huang<sup>1</sup>, Yanxi Ji<sup>1</sup>, Feng Cong<sup>5</sup>,  
6     Yinzhu Luo<sup>5</sup>, Yujun Zhu<sup>5</sup>, Hemi Luan<sup>6</sup>, Huan Zhang<sup>7</sup>, Jingdiao Chen<sup>7</sup>, Xue Liu<sup>1</sup>, Ping  
7     Wang<sup>2</sup>, Yang Yu<sup>2</sup>, Fan Xing<sup>1</sup>, Bixia Ke<sup>7</sup>, Huanying Zheng<sup>7</sup>, Xiaoling Deng<sup>7</sup>, Wenyong  
8     Zhang<sup>6</sup>, Chun-Mei Li<sup>1</sup>, Yu Zhang<sup>5</sup>, Jincun Zhao<sup>4</sup>, Xumu Zhang<sup>2,3,\*</sup>, Deyin Guo<sup>1,\*</sup>

9

10    **Affiliations:**

11    <sup>1</sup> Centre for Infection and Immunity Studies (CIIS), School of Medicine, Shenzhen  
12    Campus of Sun Yat-sen University, Guangdong 518107, China.

13    <sup>2</sup> Shenzhen Key Laboratory of Small Molecule Drug Discovery and Synthesis,  
14    Department of Chemistry, College of Science, Academy for Advanced  
15    Interdisciplinary Studies, Southern University of Science and Technology, Shenzhen,  
16    Guangdong 518055, China

17    <sup>3</sup> Medi-X Pingshan, Southern University of Science and Technology, Shenzhen,  
18    Guangdong 518118, China

19    <sup>4</sup> State Key Laboratory of Respiratory Disease, National Clinical Research Center for  
20    Respiratory Disease, Guangzhou Institute of Respiratory Health, the First Affiliated  
21    Hospital of Guangzhou Medical University, Guangzhou, Guangdong 510182, China

22    <sup>5</sup> Guangdong Province Key Laboratory of Laboratory Animals, Guangdong Laboratory  
23    Animals Monitoring Institute, Guangzhou, Guangdong 510663, China.

24    <sup>6</sup> School of Medicine, Southern University of Science and Technology, Shenzhen,  
25    Guangdong 518055, China

26    <sup>7</sup> Center for Disease Control and Prevention of Guangdong Province, Guangzhou,  
27    Guangdong 511430, China

28

29

30 \* Correspondence to: Deyin Guo (guodeyin@mail.sysu.edu.cn), Xumu Zhang  
31 (zhangxm@sustech.edu.cn) and Yingjun Li (liyj@sustech.edu.cn).

32 # These authors contributed equally to this work.

### 33 **Abstract**

34 Severe acute respiratory syndrome coronavirus 2 (SARS-CoV-2), which causes the  
35 COVID-19 pandemic, is rapidly evolving. Due to the limited efficacy of vaccination in  
36 prevention of SARS-CoV-2 transmission and continuous emergence of variants of  
37 concern (VOC), including the currently most prevalent Delta variant, orally  
38 bioavailable and broadly efficacious antiviral drugs are urgently needed. Previously we  
39 showed that adenosine analogue 69-0 (also known as GS-441524), possesses potent  
40 anti-SARS-CoV-2 activity. Herein, we report that esterification of the 5'-hydroxyl  
41 moieties of 69-0 markedly improved the antiviral potency. The 5'-hydroxyl -isobutyryl  
42 prodrug, ATV006, showed excellent oral bioavailability in rats and cynomolgus  
43 monkeys and potent antiviral efficacy against different VOCs of SARS-CoV-2 in cell  
44 culture and three mouse models. Oral administration of ATV006 significantly reduced  
45 viral loads, alleviated lung damage and rescued mice from death in the K18-hACE2  
46 mouse model challenged with the Delta variant. Moreover, ATV006 showed broad  
47 antiviral efficacy against different mammal-infecting coronaviruses. These indicate that  
48 ATV006 represents a promising oral drug candidate against SARS-CoV-2 VOCs and  
49 other coronaviruses.

### 50 **Keywords:**

51 SARS-CoV-2, Delta variant, antiviral drug, nucleoside analogue, ATV006,  
52 Coronavirus.

### 53 **Introduction**

54 The outbreak of COVID-19 pandemic, caused by SARS-CoV-2, has been continuing  
55 for over one year and has resulted in over 228 million confirmed infections and over 4  
56 million reported deaths worldwide as of 20 September 2021 (WHO 2021b). SARS-  
57 CoV-2 is a positive-sense, single-stranded RNA virus belonging to the genus

58 *Betacoronavirus* of the family *Coronaviridae* (Chen et al. 2020). Two other members  
59 of the same genus, namely severe acute respiratory syndrome coronavirus (SARS-CoV)  
60 and Middle East respiratory syndrome coronavirus (MERS-CoV), have caused  
61 outbreaks with substantial fatality rates in 2002 and 2012, respectively (Al-Tawfiq et  
62 al. 2014; Perlman et al. 2009). Given the repeated and accelerating emergence of highly  
63 pathogenic coronaviruses, it is increasingly important to develop broadly effective anti-  
64 coronaviral agents to combat the pandemics of COVID-19 and the future emerging  
65 CoVs.

66 Although the coronavirus has a certain proofreading ability (Robson et al. 2020), it  
67 still has a high mutation rate. Progressive mutational change in the virus is therefore  
68 inevitable after a number of replicative cycles, which leads to the emergence of new  
69 variants. At present, the WHO has classified many variants of the SARS-CoV-2 (WHO  
70 2021a), including the variants of concern (VOC), such as the Alpha variant (B.1.1.7),  
71 Beta variant (B.1.351) and Delta variant (B.1.671.2). Delta variant is highly contagious,  
72 and has rapidly become the prevalent variant, contributing to the current wave of  
73 pandemic in India and worldwide and leading to vaccine breakthrough infections  
74 associated with higher viral load and long duration of shedding (Reardon 2021). These  
75 SARS-CoV-2 variants reduced the vaccine effectiveness and antibody protection  
76 (Harvey et al. 2021; Liu et al. 2021; Tegally et al. 2021). Currently available directly-  
77 acting antiviral drugs repurposed for treatment of COVID-19 patients showed limited  
78 efficacy in large-scale clinical trials (Consortium et al. 2021). Therefore, it is in urgent  
79 need to develop orally available and broadly efficacious anti-coronaviral agents against  
80 SARS-CoV-2 and its variants.

81 The non-structural protein 12 (nsp12) of SARS-COV-2 acts as the RNA-dependent  
82 RNA polymerase (RdRp), which catalyzes RNA template-dependent formation of  
83 phosphodiester bonds between ribonucleotides using ribonucleoside triphosphates as  
84 substrates, serving as the key component of the replication/transcription machinery

85 (Hillen et al. 2020; Wang et al. 2020b). RdRps are considered as the primary targets for  
86 antiviral drug development in a wide variety of viruses (Kabinger et al. 2021; Picarazzi  
87 et al. 2020). Several nucleoside or nucleotide analogues, including remdesivir, AT-527,  
88 favipiravir and molnupiravir (EIDD-2801), originally developed by targeting the RdRp  
89 of other RNA viruses, have been repurposed for SARS-CoV-2 since the COVID-19  
90 outbreak (Ghasemnejad-Berenji et al. 2021; Goldman et al. 2020; Good et al. 2021;  
91 Wahl et al. 2021; Wang et al. 2020a). Until now, remdesivir is the only FDA-approved  
92 antiviral drug for the treatment of COVID-19 patients (Beigel et al. 2020). However,  
93 remdesivir is administered by intravenous (IV) injection and thus has a clinical  
94 application limited to hospitalized patients with relatively advanced disease (Alanazi et  
95 al. 2019; Beigel et al. 2020; Consortium et al. 2021). We and others reported that the  
96 parent nucleoside of remdesivir, with CAS registry number 1191237-69-0 (named as  
97 69-0, also known as GS-441524), potently inhibits SARS-CoV-2 infection in cell  
98 culture and mouse models infected with SARS-CoV-2 (Li et al. 2021; Pruijssers et al.  
99 2020). 69-0 is a 1'-cyano-substituted adenosine analogue with broad-spectrum antiviral  
100 activities across multiple virus families (Cho et al. 2012; Huang et al. 2021; Murphy et  
101 al. 2018; Pedersen et al. 2019). However, 69-0 suffers from its disadvantage of poor  
102 solubility (water solubility of  $< 1 \mu\text{g/mL}$ ) and poor oral pharmacokinetic (PK) profile  
103 (Li et al. 2021). In non-human primates, 69-0 has an oral bioavailability of 8.3% and  
104 poor plasma exposure, preventing it from further development into an oral drug  
105 (NCATS 2021).

106 In this study, we reported a series ester prodrugs of adenosine analogues 69-0 with  
107 improved antiviral potency. The isobutyryl nucleoside derivative of 69-0, named as  
108 ATV006, with improved oral PK profiles, potently inhibited the replication of SARS-  
109 CoV-2 and other CoVs. In three different animal models, ATV006 could efficaciously  
110 suppress the infection and pathogenesis of SARS-CoV-2 and its variants including the  
111 most prevalent Delta variant. These results indicate that ATV006 represents a

112 promising drug candidate for the further clinical development against COVID-19 and  
113 other CoV diseases.

## 114 **Results**

### 115 **Design and synthesis of prodrugs of adenosine analogs that target SARS-CoV-2**

#### 116 **RNA polymerase**

117 Although the adenosine analogue 69-0 was effective against SARS-CoV-2 in vitro  
118 and in mouse models, it suffers from poor oral bioavailability, which hampers its further  
119 development as oral drug as shown in our previous study(Li et al. 2021). To overcome  
120 this limitation, we devoted our efforts to synthesize 69-0 prodrugs by employing short  
121 chain fatty acid (SCFA) or amino acid to mask the polar hydroxyl- or amino-groups.  
122 For this, 21 compounds with different substitutions at the positions of **R<sup>1</sup>**, **R<sup>2</sup>**, **R<sup>3</sup>** and  
123 **R<sup>4</sup> of 69-0** were designed and chemically synthesized (Fig 1; supplementary materials).  
124 In brief, the compounds ATV001-004 were synthesized from 69-0 via one-step  
125 acylation reaction with related acid anhydride in the presence of  
126 dimethylaminopyridine (DMAP) and ethylene glycol dimethacrylate (EDMA). To  
127 synthesize 5'-hydroxyl-acetylated compounds, the 2',3'-hydroxyl moieties of 69-0 were  
128 firstly protected with acetonide in the presence of sulfuric acid. Then, different aliphatic  
129 acids, amino acids or benzoic acid were selectively coupled with the free hydroxyl  
130 group on C5' position to produce the corresponding esters. Final deprotection of the  
131 acetonide with 6N hydrochloride acid (HCl) afforded the target compounds ATV005-  
132 024. All the compounds were purified by high performance liquid chromatography  
133 (HPLC), reaching a purity of above 95%.

134 The antiviral effect of the compounds was initially evaluated by using a biosafe  
135 SARS-CoV-2 replicon system (pBAC- SARS-CoV-2-Replicon-Luc), established in  
136 our previous work (Jin et al. 2021), which carries all the genes essential to genome  
137 replication including that for RdRp and the luciferase reporter gene but does not  
138 produce infectious virus particles. We first tested the percentage inhibition of the

139 replicon replication at 10  $\mu$ M of each compound (Fig S1A) and then selected 17  
140 compounds to measure their concentration for 50% of maximal effect ( $EC_{50}$ ) value,  
141 which ranged from 0.217 to 2.351  $\mu$ M (Fig S1B). As shown in Fig S1A and S1B, the  
142 compounds ATV001 and ATV002 with isobutyryl amide or acetyl amide at the base  
143 moiety showed decreased antiviral activities probably due to the biostable amide group  
144 that obstructs the hydrogen bond formation between inhibitor and RNA template  
145 (Kokic et al. 2021; Wang et al. 2020b). Tri-esterification of the hydroxyl groups on C5'  
146 ( $R^1$ ), C2' ( $R^2$ ) and C3' ( $R^3$ ) positions (ATV003-004) did not significantly change the  
147 activity while the mono-isobutyryl- modification of 5'-hydroxyl group (ATV006)  
148 markedly improved the inhibitory activities in the replicon system ( $EC_{50}$  value of 0.52  
149  $\mu$ M, about one-fold more potent compared to parent 69-0). We then kept the 2' and 3'  
150 hydroxyl group unchanged, while the  $R^1$  group was replaced with straight cyclic,  
151 branched SCFA, benzyl acyl- group or amino acid- group (ATV007-024). We found  
152 that some of the SCFA ester prodrug compounds displayed an improvement in potency  
153 relative to 69-0. Six compounds (ATV019-024) bearing L- or D- amino acid ester were  
154 designed to improve drug absorption by targeting the peptide transporter family 1  
155 (PepT1) (Zhang et al. 2013). However, these compounds did not show improved  
156 activities against the replicon or improved permeabilities in Caco-2 cells (Table S1).

157 Together, SCFA esterification on C5' position could generally improve the potency  
158 relative to 69-0. Then we selected six compounds from the SCFA group for further  
159 analysis of anti-SARS-CoV-2 activity with the live viruses of different variants in cell  
160 culture and animal models (Table 1).

## 161 **The adenosine analog prodrug ATV006 potently inhibits the replication of SARS-** 162 **CoV-2 and its variants of concern**

163 The antiviral efficacy of the six SCFA prodrugs (ATV006, ATV009-011, ATV013  
164 and ATV017) was first evaluated in a cell culture model infected with different strains  
165 of SARS-CoV-2, including the early strain B.1, and two prevalent SARS-CoV variants

166 of concern (VOC), the Beta (B.1.351) and Delta (B.1.671.2) variants (Fig 2, Table 1).  
167 The Vero E6 cells were treated with the compounds and then infected with SARS-CoV-  
168 2 at a multiplicity of infection (MOI) of 0.05, and the copy number of viral genome  
169 RNA in the cell culture supernatant was measured by the quantitative real-time  
170 polymerase chain reaction (qRT-PCR) 48 h post infection (hpi). As shown in Figure 2  
171 and Table 1, the compounds showed improved potency against SARS-CoV-2 relative  
172 to remdesivir and 69-0, which was in consistency with the results of the SARS-CoV-2  
173 replicon system. Among them, ATV010 exhibited low micromolar  $EC_{50}$  value with  
174 early strain B.1 and Beta variant, while ATV006 had an overall >4-fold potency  
175 improvement in inhibiting the replication of Delta variant, with  $EC_{50}$  reaching 0.3485  
176  $\mu\text{M}$ . We repeated the antiviral experiment of the compounds in Huh7 cells with B.1  
177 strain, and the results showed that these compounds exhibited similar antiviral activity  
178 to that in Vero E6 cells (Fig S2). Together, these results indicate that SCFA-esterified  
179 compounds could potentially inhibit the replication of SARS-CoV-2 and its variants.

180 The cytotoxicity of the compounds was evaluated on Vero E6 cells with the CCK8  
181 assays (Fig S3). The results showed that most of the compounds had low toxicity with  
182  $CC_{50} > 50 \mu\text{M}$ , except for ATV010 with  $CC_{50}$  of 44.62  $\mu\text{M}$ , suggesting that most  
183 compounds had excellent safety. The therapeutic index ( $CC_{50}/EC_{50}$ ) of ATV006 was  
184 as high as 367 in Vero E6 cells. Considering the potent inhibition against Delta variant  
185 and high selectivity against cell proliferation, ATV006 was selected for further studies.

### 186 **Pharmacokinetic properties of ATV006 in rats and cynomolgus monkeys.**

187 To assess the oral absorption of ATV006, the pharmacokinetic (PK) studies were  
188 conducted in rats and monkeys. Following oral dosing of 20 mg/kg in rats, ATV006  
189 displayed high oral bioavailability (F%) of 98%, using the parent nucleoside 69-0 as an  
190 analyte (Table 2). The  $C_{\text{max}}$  of 11445  $\mu\text{g/L}$  was achieved 0.83 h after the oral  
191 administration, indicating its effective blood exposure. Plasma concentration decayed  
192 with a half-life of 3.62 h (Fig 3A). In cynomolgus monkeys,  $C_{\text{max}}$  of averaged 2715



193  $\mu\text{g/L}$  was reached in 1.5 h after the IG administration of 10 mg/kg ATV006. Plasma  
194 concentration decayed with a  $T_{1/2}$  of 4 h and the oral bioavailability was about 30% (Fig  
195 3B). As a compound with an oral bioavailability of  $>10\%$  has the potential for  
196 development as an oral drug (Martin 2005), ATV006 well met such standard as an oral  
197 drug candidate for further testing in animal models. Next, we explored the tissue  
198 distribution of ATV006 in the mouse model by measuring its parent nucleoside 69-0.  
199 The results revealed that oral administration of ATV006 achieved a broad distribution  
200 in liver and kidney as well as in lung, the major target organ to SARS-CoV-2 infection,  
201 indicating its potential of an oral drug for the treatment of COVID-19 (Fig 3C).

### 202 **Orally administered ATV006 could effectively suppress SARS-CoV-2 replication** 203 **in mouse models**

204 We next investigated the in vivo antiviral activity of orally administered ATV006 in  
205 two different mouse models of SARS-CoV-2 (strain B.1) infection, one with  
206 humanized angiotensin-converting enzyme 2 (hACE2) (Sun et al. 2020b) and the other  
207 with adenovirus-delivered human ACE2 (Ad5-hACE2) (Sun et al. 2020a). The hACE2  
208 transgenic mice were intranasally inoculated with SARS-CoV-2 ( $2 \times 10^5$  plaque forming  
209 units (PFU) per mouse) and were treated with vehicle (control,  $n=6$ ), ATV006 (500  
210 mg/kg, IG, once daily,  $n=6$ ) or ATV006 (250 mg/kg, IG, once daily,  $n=6$ ), starting at 2  
211 h prior to virus inoculation (Fig 4A) and continuing until 4 days post-infection. To  
212 better determine the replication levels of SARS-CoV-2, we detected both the genomic  
213 RNA (gRNA) and subgenomic RNA (sgRNA), the latter being produced by  
214 discontinuous synthesis and representing a biomarker of coronavirus replication  
215 (Hussain et al. 2005; Kim et al. 2020) (Fig S4). In the control group, both gRNA and  
216 sgRNA of SARS-CoV-2 reached high levels in the lung, indicating that the mouse  
217 infection model was well established. In contrast, SARS-CoV-2 RNAs were hardly  
218 detectable at day 4 in the ATV006 treatment groups (Fig 4B and 4C), demonstrating  
219 robust inhibition of SARS-CoV-2 replication by ATV006.



220 We further tested the antiviral potency of ATV006 in the Ad5-hACE2 mouse model,  
221 which supports SARS-CoV-2 infection and pathogenesis in mouse lung (Sun et al.  
222 2020a). The mice were inoculated intranasally with  $1 \times 10^5$  PFU virus per mouse and  
223 were then treated with vehicle (control, n=8) or ATV006 (250 mg/kg, IG, once daily,  
224 n=8) and EIDD-2801 (500 mg/kg, IG, once daily, n=8) starting at 1 day prior to virus  
225 inoculation (Fig 4D). EIDD-2801 was previously shown to effectively inhibit SARS-  
226 CoV-2 replication at 500 mg/kg dosage (Wahl et al. 2021) and used as a positive control.  
227 The virus titers were measured, and results showed that ATV006 (250 mg/kg) and  
228 EIDD-2801 (500 mg/kg) could significantly reduce the viral load and pathological  
229 damage of the lung (Fig 4E and 4F). Together, ATV006 showed potent anti-SARS-  
230 CoV-2 efficacy in different mouse models.

### 231 **ATV006 reduces lung damage and protects mice from death by infection of the** 232 **Delta variant in the K18-hACE2 transgenic mice**

233 We next tested the antiviral potency in the K18-hACE2 transgenic mice, which are  
234 susceptible to SARS-CoV-2 and can lead to death of infected mice (Oladunni et al.  
235 2020). As the Delta variant of SARS-CoV-2 is the most prevalent variant, we  
236 specifically tested the efficacy of ATV006 against the Delta variant. The K18 hACE2  
237 mice were intranasally inoculated with SARS-CoV-2 Delta variant ( $1 \times 10^4$  PFU virus  
238 per mouse) and then treated with vehicle (control, n=11), ATV006 (250 mg/kg, IG,  
239 once daily, n=11), ATV006 (100 mg/kg, IG, once daily, n=8) or EIDD-2801 (500  
240 mg/kg, IG, once daily, n=8) starting at 2 h prior to virus inoculation (Fig 5A) and  
241 continuing until 5 days post-infection (dpi). During the 9-day observation period, the  
242 mice in the control group gradually lost weight from the fourth day and died from the  
243 sixth day, and all died on the seventh day, but all mice of treatment groups survived  
244 (Fig 5B and 5C). At 3 dpi, we evaluated the abundance of both the viral gRNA of  
245 SARS-CoV-2 in the mouse lung and brain tissue by qPCR. The amount of viral RNAs  
246 of the treatment groups was significantly lower than that of the control group, with

247 ATV006 (250 mg/kg) group having the strongest potency with reduction of viral RNA  
248 for more than 10,000 times in the lung (Fig 5D).

249 Histopathological analysis and observation were performed with the lungs of the  
250 mice infected with SARS-CoV-2 at 3 dpi. The vehicle-treated mice showed multiple  
251 injuries, including inflammatory cell infiltration ranging from the trachea, peri-alveolar  
252 space, to the interstitium whereas ATV006-treated animals had markedly alleviated  
253 symptoms in the lungs (Fig 5E and 5F). Compared with the ATV006 treatment group,  
254 the spleen of the mice in the control group was significantly enlarged, and the white  
255 pulp was atrophied to varying degrees (Fig 5G and 5H). Furthermore, ATV006  
256 markedly reduced the production of inflammatory cytokines and chemokines in the  
257 lung tissues (Fig 5I).

258 Together, our results showed that intragastric administration of ATV006 could  
259 efficiently inhibit SARS-CoV-2 replication, ameliorate SARS-CoV-2–induced lung  
260 lesions in vivo and prevent death of the mice infected by the Delta variant of SARS-  
261 CoV-2. These demonstrated the potential of ATV006 as an orally bioavailable anti-  
262 SARS-CoV-2 drug.

### 263 **ATV006 possesses broad antiviral activities against diversified coronaviruses.**

264 To explore the broad-spectrum antiviral activity of ATV006, we further tested it  
265 against other coronaviruses of the genera *Alphacoronavirus* and *Betacoronavirus* that  
266 are known to infect humans (Chen et al. 2020; Fung et al. 2019). Six coronaviruses  
267 were selected, including mouse hepatitis virus (MHV), feline infectious peritonitis virus  
268 (FIPV), porcine epidemic diarrhea virus (PEDV), canine coronavirus (CCoV),  
269 transmissible gastroenteritis virus (TGEV) and swine acute diarrhea syndrome  
270 coronavirus (SADS-CoV). Among these coronaviruses, MHV is a beta-coronavirus  
271 that is distantly related to human coronaviruses SARS-CoV-2, SARS-CoV and MERS-  
272 CoV.

273 We first compared the antiviral activities of ATV006 with that of remdesivir and 69-  
274 0 in MHV cell culture. The mouse L2 cells were infected with MHV-A59, a strain that  
275 infects the liver and brain of mice and causes acute hepatitis, encephalitis, and chronic  
276 demyelinating disease (Weiss et al. 2011), at a MOI of 0.1 and treated with different  
277 dilutions of the compounds. Antiviral activities were evaluated by qRT-PCR  
278 quantification of the viral copy number in the culture supernatant and intracellular  
279 fraction after 16 hpi. ATV006 showed robust anti-MHV activity ( $EC_{50} = 0.265 \mu\text{M}$ )  
280 compared to remdesivir ( $EC_{50} = 1.338 \mu\text{M}$ ) and 69-0 ( $EC_{50} = 0.874 \mu\text{M}$ ) in L2 cells  
281 (Fig 6A). Then we tested the antiviral activity of ATV006 against FIPV, CCoV, PEDV,  
282 TGEV and SADS-CoV, and the  $EC_{50}$  was  $1.040 \mu\text{M}$ ,  $0.186 \mu\text{M}$ ,  $1.040 \mu\text{M}$ ,  $3.045 \mu\text{M}$   
283 and  $2.490 \mu\text{M}$ , respectively, in cell culture models (Fig 6B-6F). These results indicate  
284 that ATV006 has a broad-spectrum anti-coronavirus efficacy.

285 We further evaluated the anti-coronavirus activity of ATV006 in MHV infection  
286 mouse model. The Balb/c mice were inoculated intranasally with  $1 \times 10^6$  PFU per  
287 mouse of MHV-A59, and treated with vehicle (control,  $n=5$ ) or ATV006 (500, 250,  
288 100, 50 mg/kg, IG, twice daily,  $n=5$ ), starting at 3 hours prior to virus inoculation and  
289 continuing until 2 days post-infection (Fig 7A). We found that ATV006 treatments at  
290 different dosages could prevent the weight loss of the mice (Fig 7B). At 2 dpi, we  
291 measured the viral gRNA and sgRNA copy number and virus titer in mouse lung and  
292 liver (Fig S4 and Fig 7). It was found that the treatments of high dosages of ATV006  
293 (250, 500 mg/kg) could effectively inhibit virus replication both in the lung and liver,  
294 and the 500 mg/kg group had 99% inhibition of virus replication in the lung and liver  
295 (Fig 7C-7F) while the treatment of low dosages of ATV006 (50, 100 mg/kg)  
296 significantly inhibited viral replication in the liver, but not significantly in the lung (Fig  
297 7C-7F). Histopathological analysis demonstrated that the vehicle-treated mice showed  
298 inflammatory cell infiltration, whereas ATV006 (500 mg/kg)-treated mice had  
299 alleviated symptoms in the lungs at 2 dpi (Fig 7G). In addition, ATV006 significantly  
300 reduced the production of inflammatory cytokines and chemokines, such as IL-6, IL-

301  $1\beta$  and IFN- $\gamma$  (Fig 7H). Due to the suppression of virus replication, IFN- $\beta$  and ISGs  
302 (CXCL10) also significantly decreased (Fig 7H).

303 We next explored the lowest oral dosages of ATV006 that could protect MHV-A59-  
304 infected mice from death and weight loss. As shown in Figure S5, ATV006 could  
305 prevent mouse death and weight loss of mice at dosages of 5-50 mg/kg while the mouse  
306 treated with 2 mg/kg of ATV006 began to die 4 days post infection (dpi) and all mice  
307 died till 10 dpi. In comparison, the mice of the control group all died at 8 dpi and even  
308 the treatment with 2 mg/kg ATV006 prolonged the survival time and reduced the viral  
309 load in the liver by about six times (Fig S5B-S5D). IP administration of remdesivir (20  
310 mg/kg) and IG administration of 69-0 (50 mg/kg) could also prevent death of the MHV-  
311 infected mice (Fig. S5) but the body weight of the mice was reduced in comparison  
312 with the mice treated with ATV006.

313 MHV mainly infects the liver of mouse and causes hepatitis. Therefore, we also  
314 performed intrahepatic (IH) inoculation to directly observe whether ATV006 had the  
315 effect of inhibiting virus replication in the liver and alleviating the symptoms of  
316 hepatitis (Fig S6A). Intriguingly, compared with the vehicle group, mice treated with  
317 the lowest concentration (2 mg/kg) had a 100-fold reduction in virus replication by  
318 measurement of the viral RNA load by qPCR, or the virus titer by plaque assay (Fig  
319 S6B, S6C and S6D). The serum ALT and AST values of ATV006-treated mouse were  
320 significantly lower than that of the control group (Fig S6E and S6F). The results of  
321 histopathological analysis also showed that after ATV006 treatment, the inflammatory  
322 cell infiltration in the liver was significantly reduced (Fig S6G). ATV006 could reduce  
323 the production of various inflammatory cytokines (Fig S6H). The above results  
324 demonstrate that ATV006 could also inhibit the replication of MHV-A59 in both the  
325 lung and liver in the mouse model and prevent the death of MHV-infected mice,  
326 indicating that ATV006 has a broad anti-coronavirus activity.

327 **Discussion**

328 COVID-19, caused by SARS-CoV-2, is currently spreading globally, threatening  
329 human health and economic development. The vaccine-induced or naturally acquired  
330 protective herd immunity to interruption of transmission chains had been hampered by  
331 the rapid evolution and recurrent emergence of SARS-CoV-2 variants, such as Delta  
332 variant, one of the major variants of concern (VOC) (Liu et al. 2021; McCallum et al.  
333 2021). Therefore, effective and broad-spectrum anti-SARS-CoV-2 drugs are  
334 desperately needed. Until now, remdesivir is the only FDA-approved small molecule  
335 antiviral drug for the treatment of COVID-19. However, the obligatory IV  
336 administration of remdesivir limits its clinical application only for hospitalized patients  
337 with advanced symptoms and its efficacy is limited in large scale clinical trials (Beigel  
338 et al. 2020). As COVID-19 is an acute infectious disease, antiviral treatment can exert  
339 its best effect at the early stage of the infection. In contrast, at the late stage of COVID-  
340 19 with hospitalized patients, anti-inflammatory therapy may play a major role in  
341 lessening the symptoms. Therefore, orally bioavailable anti-SARS-CoV-2 drugs  
342 suitable for outpatients are superior to injectable drugs applied to hospitalized patients.

343 Previously, we reported 69-0, the major metabolite and the parent nucleotide of  
344 remdesivir that targets the RdRp of SARS-CoV-2, has a better inhibitory activity on  
345 SARS-CoV-2 and MHV-A59 in vitro and in vivo (Li et al. 2021). However, the  
346 unfavorable oral PK prevents the further development of 69-0 (Li et al. 2021; NCATS  
347 2021). To address this issue, herein, we synthesized a series of SCFA and amino acid  
348 prodrug of 69-0 aiming at overcoming its limitations. Among the compounds  
349 synthesized, the isobutyryl adenosine analogue ATV006 had improved oral absorption  
350 and potently inhibited the replication of SARS-CoV-2, especially the Delta variant (Fig  
351 2). Compared to remdesivir, ATV006 is structurally simpler and easier to synthesize  
352 via a three-step transformation with 69-0 as starting material, which would reduce the  
353 cost and accelerate mass production. In addition, the orally active ATV006 is  
354 potentially more useful for the management of SARS-CoV-2 infection at the early stage.

355 After oral administration of ATV006, it is rapidly hydrolyzed by cellular esterases to  
356 produce the parent nucleoside 69-0 (Hsu et al. 2003; Lavis 2008), which then undergoes  
357 three steps of phosphorylation and is transformed to the active triphosphate form (Fig  
358 3C), the same active component as that of remdesivir. Therefore, ATV006 shares the  
359 same mechanism of stalling SARS-CoV-2 polymerase as that of remdesivir (Kokic et  
360 al. 2021; Mackman et al. 2021; Wei et al. 2021; Yin et al. 2020a).

361 Several other small-molecule anti-SARS-CoV-2 antivirals are also under  
362 development, including the ones that block viral entry, inhibit Mpro, and target host  
363 immunity (Faheem et al. 2020; Good et al. 2021; Kabinger et al. 2021; Li et al. 2021;  
364 Minghua et al. 2021; Pruijssers et al. 2020; Sabbah et al. 2021; Vuong et al. 2021; Wahl  
365 et al. 2021; Zhang et al. 2021). Among them, EIDD-2801 was an orally available  
366 prodrug of nucleoside analog at phase 3 clinical trials and it was granted provisional  
367 approval in Australia in August, 2021. Clinical studies showed that a 5-day treatment  
368 of EIDD-2801 has a 100% SARS-CoV-2 clearance rate in the non-hospitalized patient  
369 (ClinicalTrials.gov NCT04405570) (Fischer et al. 2021). EIDD-2801 was reported to  
370 induce a two-step mutagenesis of viral RNA that is different to the inhibitory  
371 mechanism of ATV006 (Kabinger et al. 2021). We compared the antiviral efficiency of  
372 ATV006 with that of EIDD-2801 in the same experimental settings, and the results  
373 demonstrated that ATV006 possesses similar or higher anti-SARS-CoV-2 potency in  
374 different mouse models (Fig. 4 and Fig. 5).

375 Delta variant recently causes the sharp rise in SARS-CoV-2 cases worldwide.  
376 Compared to the original strain, Alpha and Beta variant, the Delta variant is more  
377 infectious and pathogenic (Motozono et al. 2021; Reardon 2021; Teyssou et al. 2021).  
378 Intriguingly, ATV006 showed an improved antiviral potency against Delta variant and  
379 the  $EC_{50}$  of ATV006 was about 3-4 times lower against Delta than the original strain  
380 and Beta variant (Fig 2). Oral treatments of ATV006 250 mg/kg, 100 mg/kg) as well as  
381 EIDD-2801 (500 mg/kg) effectively protected mice from severe weight loss and death

382 induced by the infection of Delta variant (Fig 5C), indicating the high efficacy of  
383 ATV006 against the prevalent VOC. The signature mutations of the variants reside  
384 mainly in the receptor binding domain of spike protein (McCallum et al. 2021; Salleh  
385 et al. 2021) while the key residues of the nucleoside analog-binding and RdRp catalytic  
386 sites are 100% conserved (Fig S7). Therefore, we speculate that the increased  
387 sensitivity of Delta to ATV006 may be related to its high replication rate but not to the  
388 mutations in RdRp. The detailed mechanism needs to be further investigated in the  
389 future work. The analysis of 5,600 SARS-CoV-2 genomes also indicated that the  
390 adenosine analog, the parent nucleoside of remdesivir, does not seem to exert high  
391 selective pressure (Mari et al. 2021), suggesting that ATV006 and similar adenosine  
392 analogs have low risk to induce escape mutation and drug resistance.

393 The RdRp-encoding nsp12 is the most conserved protein in the coronaviruses. The  
394 key residues of nsp12 that are essential for RdRp enzymatic activity (Jin et al. 2021)  
395 and the binding with the parent nucleoside of remdesivir (Yin et al. 2020b) are 100%  
396 conserved throughout the coronaviruses of *Alphacoronavirus* and *Betacoronavirus*  
397 (Fig). Indeed, our current study demonstrated that ATV006 has a broad antiviral  
398 activity against different coronaviruses, including MHV, FIPV, CCoV, PEDV, TGEV  
399 and SADS (Fig 2 and Fig 6) (Haake et al. 2020; Izes et al. 2020; Korner et al. 2020;  
400 Laude et al. 1990; Lee 2015; Weiss et al. 2011; Zhou et al. 2018). The parent nucleoside  
401 69-0 was previously reported to be broadly active against viruses that belong to the  
402 families *Paramyxoviridae*, *Coronaviridae* and *Filoviridae* (Cho et al. 2012; Huang et  
403 al. 2021; Lo et al. 2017; Murphy et al. 2018; Pedersen et al. 2019), indicating the  
404 potential for more broad antiviral application of ATV006. Collectively, our results  
405 demonstrated that ATV006 has potent and broad efficacy against SARS-CoV-2 and its  
406 variants of concern as well as other coronaviruses, thus representing a promising orally  
407 available drug candidate for the treatment for COVID-19 and emerging coronavirus  
408 diseases in the future.



409 **Materials and Methods**

410 **Compounds, cells, and viruses**

411 The preparation of novel compounds, <sup>1</sup>H NMR, <sup>13</sup>C NMR, HRMS analysis and  
412 HPLC purity are supplied in the Supplementary Information.

413 HEK 293T cells were obtained from American Tissue Culture Collection  
414 (ATCC). Rat lung epithelial cells (L2) and wild-type MHV-A59 were kindly provided  
415 by Rong Ye (Shanghai Medical School of Fudan University). African green monkey  
416 kidney Vero E6 cell line (Vero E6) was kindly provided by Dr. Hui Zhang (Sun Yat-  
417 sen University). Feline kidney cells (CRFK cells) and swine testicle cells (ST cells)  
418 were provided from Guangdong Province Key Laboratory of Laboratory Animals.  
419 HEK 293T, Vero E6, L2, CRFK and ST cells were cultured in DMEM supplemented  
420 with 10% FBS, 100 U/mL penicillin and streptomycin at 37 °C in a humidified  
421 atmosphere of 5% CO<sub>2</sub>.

422 SARS-CoV-2 (B.1, hCoV-19/CHN/SYSU-IHV/2020 strain, Accession ID on  
423 GISAID: EPI\_ISL\_444969) was isolated from a sputum sample from a woman  
424 admitted to the Eighth People's Hospital of Guangzhou.

425 SARS-CoV-2 (B.1.351, SARS\_CoV-2\_human\_CHN\_20SF18530\_2020,  
426 Accession ID on GWH: WHBDSE01000000) was isolated from a throat swab sample  
427 from a man admitted to the Eighth People's Hospital of Guangzhou.

428 SARS-CoV-2 (B.1.617.2, GDPCC 2.00096) was isolated from a patient infected  
429 with SARS-CoV-2 Delta variant admitted in the Guangzhou Eighth People's Hospital  
430 by Center for Disease Control and Prevention of Guangdong Province (Wang et al.  
431 2021).

432 Canine coronavirus (CCoV), Porcine epidemic diarrhea virus (PEDV),  
433 Transmissible gastroenteritis virus (TGEV), Swine acute diarrhea syndrome

434 coronavirus (SADS-CoV) and Infectious peritonitis virus (FIPV) were stored at  
435 Guangdong Province Key Laboratory of Laboratory Animals.

436 SARS-CoV-2 infection experiments were performed in the BSL-3 laboratory of  
437 Sun Yat-sen University or Guangzhou Customs District Technology Center.

438 MHV-A59 infection experiments were performed in the Biosafety Level 2 (BSL  
439 2) laboratory of Guangdong Laboratory Animals Monitoring Institute. All animal  
440 studies protocols were approved by the Animal Welfare Committee and all  
441 procedures used in animal studies complied with the guidelines and policies of the  
442 Animal Care and Use Committee.

#### 443 **SARS-CoV-2 replicon assays**

444 The assays were performed following the manufacturer's instructions (Promega  
445 Corporation, Fitchburg, WI, USA). In brief, the cells in 24-well plate transfected with  
446 500 ng pBAC- SARS-CoV-2-Replicon-Luciferase plasmid and 10 ng RL-TK  
447 plasmid. After 6-8 h, the cells are transfected, the supernatant was discarded and  
448 replaced with fresh DMEM medium, followed by adding each compound (described  
449 in Table 1) to the media with the final concentration of 50  $\mu$ M, 10  $\mu$ M, 5  $\mu$ M, 2  $\mu$ M, 1  
450  $\mu$ M, 0.1  $\mu$ M or 0.01  $\mu$ M. After 60 h, cells were lysed in 200  $\mu$ L Passive Lysis Buffer  
451 (PLB). Each lysate (20  $\mu$ L) was transferred into 96-well white plate and then mixed  
452 with 20  $\mu$ L Luciferase Assay Reagent II, followed by 20  $\mu$ L of Stop & Glo solution.  
453 The luminescence values of the two-step reaction were recorded using a luminescence  
454 detector in Synergy H1 Hybrid Multi-Mode Reader.

#### 455 **Anti-SARS-CoV-2 activity assays**

456 Vero E6 and Huh7 cells were seeded at  $2 \times 10^4$  cells per well in 48-well plates.  
457 Cells were allowed to adhere for 16-24 h and then infected at MOI of 0.05 with  
458 SARS-CoV-2 for 1 h at 37°C. Then viral inoculum was removed, and cells were  
459 washed 2 times with pre-warmed PBS. Medium containing dilutions of compounds,

460 or DMSO was added. At 48 hpi, supernatants or cells were harvested for qRT-PCR  
461 analysis. The dose-response curves were plotted from viral RNA copies versus the  
462 drug concentrations using GraphPad Prism 6 software.

#### 463 **Anti- MHV-A59 Activity Assays**

464 L2 cells were seeded at  $1 \times 10^5$  cells per well in 6-well plates. Cells were allowed  
465 to adhere for 16-24 h and then infected at MOI of 0.1 with MHV-A59 for 1h at 37°C.  
466 Then viral inoculum was removed, and cells were washed 2 times with pre-warmed  
467 PBS. Medium containing dilutions of compounds (ATV006, 69-0 and remdesivir), or  
468 DMSO was added. At 20 hpi, supernatants were harvested for qRT-PCR analysis. The  
469 EC<sub>50</sub> values were calculated from the dose response curve. Viruses and cells are listed  
470 in Table S2. qPCR primers are listed in Table S3.

#### 471 **Anti- FIPV, CCoV, PEDV TGEV and SADS Activity Assays**

472 Cells were seeded in 48-cell plates for 24 h to reach 80% confluence and washed  
473 thrice with serum-free medium. Cells were infected with virus (0.01 MOI) at 37°C for  
474 1 h. Medium containing dilutions of ATV006 or DMSO was added. After incubating  
475 at 37°C for 48h, cells and supernatants were harvested to determine viral loads using  
476 qRT-PCR. The EC<sub>50</sub> values were calculated from the dose response curve. Viruses  
477 and cells are listed in Table S2. qPCR primers are listed in Table S3.

#### 478 **qRT-PCR analysis**

479 For SARS-CoV-2 RNA quantification, RNA was isolated by Magbead Viral  
480 DNA/RNA Kit (CW BIO). SARS-CoV-2 nucleic acid detection kit (Daan Company)  
481 is used to detect the virus.

482 For the detection of cellular viruses and tissue viruses and cytokines, total RNA  
483 was isolated from cells or tissue samples with TRIzol reagent under the instruction of  
484 the manufacturer. The mRNAs were reverse transcribed into cDNA by PrimeScript

485 RT reagent Kit (Takara). The cDNA was amplified by a fast two-step amplification  
486 program using ChamQ Universal SYBR qPCR Master Mix (Vazyme Biotech Co.,  
487 Ltd) or Taq Pro HS Universal Probe Master Mix (Vazyme Biotech Co., Ltd). GAPDH  
488 was used to normalize the input samples via the  $\Delta C_t$  method. The relative mRNA  
489 expression level of each gene was normalized to GAPDH housekeeping gene  
490 expression in the untreated condition, and fold induction was calculated by the  $\Delta\Delta C_T$   
491 method relative to those in untreated samples. The qRT-PCR primers are listed in  
492 Table S3.

### 493 **CCK-8 cell viability assay**

494 To investigate the effect of drugs on cell viability, Vero E6 cells were seeded in  
495 96-well plates at a density of 20,000 cells/well and were treated with drugs at  
496 indicated concentrations (0, 0.01, 0.1, 1, 5, 10, 50  $\mu\text{M}$ ) for 48 h. Cell viability was  
497 tested by using Cell Counting Kit-8 (CCK-8, Bimake, B34302). The figures were  
498 plotted from viral RNA copies in supernatants versus the drug concentrations using  
499 GraphPad Prism 6 software.

### 500 **PK study in rat**

501 Male SD rats (180-220 g, N = 3) were fasted for 12 h before drug administration.  
502 ATV006 was administered intravenously at 4 mg/kg or intragastrically at 20 mg/kg.  
503 Blood samples were collected from the jugular vein into anticoagulant EDTA-K2  
504 tubes at 0.083, 0.25, 0.5, 1, 2, 3, 4, 6, 8 and 24 h for the IV group, and 0.25, 1, 0.5, 2,  
505 3, 4, 6, 8 and 24 h for the IG group, respectively. All samples were centrifuged under  
506 4000 rpm/min for 10 min at 4 °C and the plasma (supernatants) were collected and  
507 stored at -65 °C for future analysis. An aliquot of 50  $\mu\text{L}$  each plasma sample was  
508 treated with 250  $\mu\text{L}$  of acetonitrile. The samples were centrifuged under 4000  
509 rpm/min for 10 min and filtered through 0.2  $\mu\text{m}$  membrane filters. The concentration  
510 of analytes in each sample were analyzed by LC/MS/MS.

## 511 **PK study in cynomolgus monkeys**

512 Three male cynomolgus monkeys (2 to 5 years of age, weighing 3 to 5 kg) were  
513 used were orally received AVT006 of 10 mg/kg on day 1. After administration, the  
514 blood samples for plasma were collected from a jugular vein into anticoagulant  
515 EDTA-K<sub>2</sub> tubes at 0.083, 0.25, 0.5, 1, 2, 4, 8, 24 and 48 h. After a 3-day washout  
516 period, each animal was administered intravenously with ATV006 at a dose of 5  
517 mg/kg, followed by bold collection from the jugular vein at the specified time points.  
518 All samples were centrifuged under 4000 rpm/min for 10 min at 4 °C and the plasma  
519 (supernatants) were collected and stored at -65°C for future analysis. The  
520 concentration of analytes in each sample were analyzed by LC/MS/MS.

## 521 **Tissue distribution study in mice**

522 Five C57BL/6 mice were fasted for 12-16 h before administered orally with a  
523 single dose of 100 mg/kg ATV006. After 1 h of dosing, 0.5 mL of the blood sample  
524 was taken from heart. Liver, kidney, lung, brain tissues were harvested. The blood  
525 sample was processed to the same method as in the rat PK studies. Tissue samples  
526 were homogenized and extracted with 70% methanol, after centrifuge under 4000 rpm  
527 for 10min, the supernatants were transfer to a clean tube and the concentration of  
528 analytes in each sample were analyzed by LC/MS/MS.

## 529 **Ad5-hACE2 Mice Study**

530 The experiments were performed as previously described (Sun et al. 2020a). Mice  
531 were lightly anesthetized with isoflurane and transduced intranasally with  $2.5 \times 10^8$   
532 FFU of Ad5-ACE2 in 75  $\mu$ L DMEM. Five days post transduction, mice were infected  
533 intranasally with SARS-CoV-2 ( $1 \times 10^5$  PFU) in a total volume of 50 $\mu$ L DMEM.

## 534 **Focus forming assay (FFA)**

535 Vero E6 cells were seeded in 96-well plates one day before infection. Tissue  
536 homogenates were serially diluted and used to inoculate Vero E6 cells at 37°C for 1 h.  
537 Inoculate were then removed before adding 125  $\mu$ L 1.6% carboxymethylcellulose per

538 well and warmed to 37°C. After 24 h, cells were fixed with 4% paraformaldehyde and  
539 permeabilized with 0.2% Triton X-100. Cells were then incubated with a rabbit anti-  
540 SARS-CoV-2 nucleocapsid protein polyclonal antibody (Cat. No.: 40143-T62, Sino  
541 Biological), followed by an HRP-labeled goat anti-rabbit secondary antibody (Cat.  
542 No.: 109-035-088, Jackson Immuno Research Laboratories). The foci were visualized  
543 by TrueBlue Peroxidase Substrate (KPL) and counted with an ELISPOT reader  
544 (Cellular Technology). Viral titers were calculated as per gram tissue.

#### 545 **MHV plaque assay**

546 L2 cells were grown in 60-mm dishes to 70-80% confluence and infected with  
547 1 mL of media containing viruses at dilutions ranging from 10<sup>-3</sup> to 10<sup>-6</sup>. After 1 h at  
548 37°C, the inoculate were removed. Seven ml of 0.95% agar (Amresco) in DMEM  
549 with 5% FBS was overlaid onto cells at 1-2h. Plaques were picked between 24 and  
550 36 h. For plaque staining, 3 mL of agar containing 0.02% neutral red (Sigma-Aldrich)  
551 was overlaid onto cells. Six to eight hours later, the stained plaques were counted.

#### 552 **AST/ALT assay**

553 Blood was incubated at room temperature to allow coagulation and was then  
554 centrifuged to obtain serum; the serum was used for measurements of alanine  
555 transaminase (ALT) and aspartate aminotransferase (AST) levels using Assay Kit  
556 (Nanjing Jiancheng Bioengineering Institute).

#### 557 **H&E Staining.**

558 Mice lung, liver and spleen dissections were fixed in zinc formalin and embedded  
559 with paraffin. Tissue sections (~4 µm) were stained with hematoxylin and eosin.

#### 560 **Analysis of RdRp mutations of SARS-CoV-2 and its variants**

561 There were four subtypes high-quality SARS-CoV-2 genomes sequences  
562 available in Global Initiative on Sharing All Influenza Data (GISIAD) (Shu et al.

563 2017). These high-quality genomic sequences of SARS-CoV-2 were screened out  
564 under the following criteria: 1) complete genome (>29000bp); 2) high coverage (only  
565 entries with <1% Ns and <0.05% unique amino acid mutations and no  
566 insertion/deletion unless verified by submitter); 3) low coverage excl (exclude entries  
567 with >5% NNNs). In total, we collected Alpha (B.1.1.7) (2021.5.1-6.10), Beta  
568 (B.1.351) (2019-2021.6.10), Gamma (P.1) (2019-2021.6.10), Delta ( B.1.617.2)  
569 (2019-2021.6.10) were 108791, 13871, 18808, 29152 strains respectively.  
570 Subsequently, we eliminated 50 Ns or ns sequences. After screening, the remaining  
571 sequences were 92214, 6341, 13655, 21611 (Table S4).

572 SARS-CoV-2 genome of NC\_045512.2 (Wu et al. 2020) was utilized as the  
573 reference sequence. Multiple sequences alignments were performed using the  
574 progressive method (FFT-NS-2) implemented in MAFFT (version 7.4) (Kato et al.  
575 2002). The whole genome mutation analysis was carried out used the pipeline  
576 provided by CoVa (Ali. et al. 2021) (version 0.2) software. Finally, the ggplot2 was  
577 used for drawing in R.

### 578 **Coronavirus RdRp Conservation Analysis**

579 Virus data collection is derived from International Committee on Taxonomy of  
580 Viruses (ICTV) and NCBI, multi-sequence comparisons using mega 6 , and data  
581 visualization using texshade (Beitz 2000) (Table S4). The sequence of 523aa-734aa of  
582 RdRp is selected for display, where K545, R555, S682, N691 and D760 are the key  
583 sites for remdesivir binding to RdRp, and 759-761 (SDD) is the key site enzyme  
584 activity of RdRp.

### 585 **Statistical analysis.**

586 All values are mean  $\pm$  SD or SEM of individual samples. Data analysis was  
587 performed with GraphPad Prism Software (GraphPad Software Inc., version 6.01).  
588 The statistical tests utilized are two-tailed and respective details have been indicated



589 in figure legends. p-value of  $< 0.05$  were considered statistically significant. (\*, p-  
590 value of  $\leq 0.05$ . \*\*, p-value of  $\leq 0.005$ . \*\*\*, p-value of  $\leq 0.0005$ . \*\*\*\*, p-value of  $\leq$   
591 0.0001).

592

### 593 **ACKNOWLEDGEMENTS**

594 The project was supported by Shenzhen Science and Technology Program  
595 (JSGG20200225150431472, ZDSYS20190902093215877 &  
596 KQTD20180411143323605), Shenzhen Bay Laboratory (SZBL2019062801006),  
597 Guangdong Basic and Applied Basic Research Foundation (Grant  
598 #2020A1515110361) and National Natural Science Foundation of China (grant  
599 #32041002 & #81620108020). D.G. is also supported by Guangdong Zhujiang  
600 Talents Program and National Ten-thousand Talents Program. We thank Dr. Chuwen  
601 Lin from School of Medicine, Sun Yat-Sen University for the help in lung pathology  
602 analysis. We thank the Center for Disease Control and Prevention of Guangdong  
603 Province for providing the Delta variant of SARS-CoV-2.

604

605

### 606 **REFERENCES**

607

- 608 Al-Tawfiq, J. A., and Z. A. Memish. 2014. 'Middle East respiratory  
609 syndrome coronavirus: transmission and phylogenetic evolution',  
610 *Trends Microbiol*, 22: 573–9.
- 611 Alanazi, A. S., E. James, and Y. Mehellou. 2019. 'The ProTide Prodrug  
612 Technology: Where Next?', *ACS Med Chem Lett*, 10: 2–5.
- 613 Ali., Farhan, Mohak Sharda., and Aswin Sai Narain Seshasayee. 2021.  
614 'SARS-CoV-2 sequence typing, evolution and signatures of  
615 selection using CoVa, a Python-based command-line utility',  
616 *bioRxiv*.
- 617 Beigel, J. H., K. M. Tomashek, L. E. Dodd, A. K. Mehta, B. S.  
618 Zingman, A. C. Kalil, E. Hohmann, H. Y. Chu, A. Luetkemeyer, S.  
619 Kline, D. Lopez de Castilla, R. W. Finberg, K. Dierberg, V.  
620 Tapon, L. Hsieh, T. F. Patterson, R. Paredes, D. A. Sweeney,  
621 W. R. Short, G. Touloumi, D. C. Lye, N. Ohmagari, M. D. Oh, G.  
622 M. Ruiz-Palacios, T. Benfield, G. Fatkenheuer, M. G.  
623 Kortepeter, R. L. Atmar, C. B. Creech, J. Lundgren, A. G.

- 624 Babiker, S. Pett, J. D. Neaton, T. H. Burgess, T. Bonnett, M.  
625 Green, M. Makowski, A. Osinusi, S. Nayak, H. C. Lane, and Actt-  
626 Study Group Members. 2020. 'Remdesivir for the Treatment of  
627 Covid-19 - Final Report', *N Engl J Med*, 383: 1813-26.
- 628 Beitz, E. 2000. 'TEXshade: shading and labeling of multiple sequence  
629 alignments using LATEX2 epsilon', *Bioinformatics*, 16: 135-9.
- 630 Chen, Y., Q. Liu, and D. Guo. 2020. 'Emerging coronaviruses: Genome  
631 structure, replication, and pathogenesis', *J Med Virol*, 92:  
632 2249.
- 633 Cho, A., O. L. Saunders, T. Butler, L. Zhang, J. Xu, J. E. Vela, J.  
634 Y. Feng, A. S. Ray, and C. U. Kim. 2012. 'Synthesis and  
635 antiviral activity of a series of 1'-substituted 4-aza-7,9-  
636 dideazaadenosine C-nucleosides', *Bioorg Med Chem Lett*, 22:  
637 2705-7.
- 638 Consortium, W. H. O. Solidarity Trial, H. Pan, R. Peto, A. M. Henao-  
639 Restrepo, M. P. Preziosi, V. Sathiyamoorthy, Q. Abdool Karim,  
640 M. M. Alejandria, C. Hernandez Garcia, M. P. Kieny, R.  
641 Malekzadeh, S. Murthy, K. S. Reddy, M. Roses Periago, P. Abi  
642 Hanna, F. Ader, A. M. Al-Bader, A. Alhasawi, E. Allum, A.  
643 Alotaibi, C. A. Alvarez-Moreno, S. Appadoo, A. Asiri, P.  
644 Aukrust, A. Barratt-Due, S. Bellani, M. Branca, H. B. C.  
645 Cappel-Porter, N. Cerrato, T. S. Chow, N. Como, J. Eustace, P.  
646 J. Garcia, S. Godbole, E. Gotuzzo, L. Griskevicius, R. Hamra,  
647 M. Hassan, M. Hassany, D. Hutton, I. Irmansyah, L. Jancoriene,  
648 J. Kirwan, S. Kumar, P. Lennon, G. Lopardo, P. Lydon, N.  
649 Magrini, T. Maguire, S. Manevska, O. Manuel, S. McGinty, M. T.  
650 Medina, M. L. Mesa Rubio, M. C. Miranda-Montoya, J. Nel, E. P.  
651 Nunes, M. Perola, A. Portoles, M. R. Rasmin, A. Raza, H. Rees,  
652 P. P. S. Reges, C. A. Rogers, K. Salami, M. I. Salvadori, N.  
653 Sinani, J. A. C. Sterne, M. Stevanovikj, E. Tacconelli, K. A.  
654 O. Tikkinen, S. Trelle, H. Zaid, J. A. Rottingen, and S.  
655 Swaminathan. 2021. 'Repurposed Antiviral Drugs for Covid-19 -  
656 Interim WHO Solidarity Trial Results', *N Engl J Med*, 384: 497-  
657 511.
- 658 Faheem, B. K. Kumar, Kvgc Sekhar, S. Kunjiappan, J. Jamalis, R.  
659 Balaña-Fouce, B. L. Tekwani, and M. Sankaranarayanan. 2020.  
660 'Druggable targets of SARS-CoV-2 and treatment opportunities  
661 for COVID-19', *Bioorg Chem*, 104: 104269.
- 662 Fischer, W., J. J. Eron, W. Holman, M. S. Cohen, L. Fang, L. J.  
663 Szweczyk, T. P. Sheahan, R. Baric, K. R. Mollan, C. R. Wolfe,  
664 E. R. Duke, M. M. Azizad, K. Borroto-Esoda, D. A. Wohl, A. J.  
665 Loftis, P. Alabanza, F. Lipansky, and W. P. Painter. 2021.

- 666 'Molnupiravir, an Oral Antiviral Treatment for COVID-19',  
667 *medRxiv*.
- 668 Fung, T. S., and D. X. Liu. 2019. 'Human Coronavirus: Host-Pathogen  
669 Interaction', *Annu Rev Microbiol*, 73: 529-57.
- 670 Ghasemnejad-Berenji, M., and S. Pashapour. 2021. 'Favipiravir and  
671 COVID-19: A Simplified Summary', *Drug Res (Stuttg)*, 71: 166-70.
- 672 Goldman, J. D., D. C. B. Lye, D. S. Hui, K. M. Marks, R. Bruno, R.  
673 Montejano, C. D. Spinner, M. Galli, M. Y. Ahn, R. G. Nahass, Y.  
674 S. Chen, D. SenGupta, R. H. Hyland, A. O. Osinusi, H. Cao, C.  
675 Blair, X. Wei, A. Gaggar, D. M. Brainard, W. J. Towner, J.  
676 Munoz, K. M. Mullane, F. M. Marty, K. T. Tashima, G. Diaz, A.  
677 Subramanian, and Gs-Us- Investigators. 2020. 'Remdesivir for 5  
678 or 10 Days in Patients with Severe Covid-19', *N Engl J Med*,  
679 383: 1827-37.
- 680 Good, S. S., J. Westover, K. H. Jung, X. J. Zhou, A. Moussa, P. La  
681 Colla, G. Collu, B. Canard, and J. P. Sommadossi. 2021. 'AT-  
682 527, a Double Prodrug of a Guanosine Nucleotide Analog, Is a  
683 Potent Inhibitor of SARS-CoV-2 In Vitro and a Promising Oral  
684 Antiviral for Treatment of COVID-19', *Antimicrob Agents  
685 Chemother*, 65.
- 686 Haake, C., S. Cook, N. Pusterla, and B. Murphy. 2020. 'Coronavirus  
687 Infections in Companion Animals: Virology, Epidemiology,  
688 Clinical and Pathologic Features', *Viruses*, 12.
- 689 Harvey, W. T., A. M. Carabelli, B. Jackson, R. K. Gupta, E. C.  
690 Thomson, E. M. Harrison, C. Ludden, R. Reeve, A. Rambaut,  
691 Covid- Genomics UK Consortium, S. J. Peacock, and D. L.  
692 Robertson. 2021. 'SARS-CoV-2 variants, spike mutations and  
693 immune escape', *Nat Rev Microbiol*, 19: 409-24.
- 694 Hillen, H. S., G. Kokic, L. Farnung, C. Dienemann, D. Tegunov, and P.  
695 Cramer. 2020. 'Structure of replicating SARS-CoV-2 polymerase',  
696 *Nature*, 584: 154-56.
- 697 Hsu, C. H., M. Jay, P. M. Bummer, and H. J. Lehmler. 2003. 'Chemical  
698 stability of esters of nicotinic acid intended for pulmonary  
699 administration by liquid ventilation', *Pharm Res*, 20: 918-25.
- 700 Huang, Z., L. Gong, Z. Zheng, Q. Gao, X. Chen, Y. Chen, X. Chen, R.  
701 Xu, J. Zheng, Z. Xu, S. Zhang, H. Wang, and G. Zhang. 2021.  
702 'GS-441524 inhibits African swine fever virus infection in  
703 vitro', *Antiviral Res*, 191: 105081.
- 704 Hussain, S., J. Pan, Y. Chen, Y. Yang, J. Xu, Y. Peng, Y. Wu, Z. Li,  
705 Y. Zhu, P. Tien, and D. Guo. 2005. 'Identification of novel  
706 subgenomic RNAs and noncanonical transcription initiation

- 707 signals of severe acute respiratory syndrome coronavirus', *J*  
708 *Virology*, 79: 5288–95.
- 709 Izes, A. M., J. Yu, J. M. Norris, and M. Govendir. 2020. 'Current  
710 status on treatment options for feline infectious peritonitis  
711 and SARS-CoV-2 positive cats', *Vet Q*, 40: 322–30.
- 712 Jin, Y. , H. Lin, L. Cao, W. C. Wu, Y. Ji, L. Du, Y. Jiang, Y. Xie,  
713 K. Tong, F. Xing, F. Zheng, M. Shi, J. A. Pan, X. Peng, and D.  
714 Guo. 2021. 'A Convenient and Biosafe Replicon with Accessory  
715 Genes of SARS-CoV-2 and Its Potential Application in Antiviral  
716 Drug Discovery', *Virology Sin.*
- 717 Kabinger, F., C. Stiller, J. Schmitzova, C. Dienemann, G. Kokic, H.  
718 S. Hillen, C. Hobartner, and P. Cramer. 2021. 'Mechanism of  
719 molnupiravir-induced SARS-CoV-2 mutagenesis', *Nat Struct Mol*  
720 *Biol.*
- 721 Katoh, K., K. Misawa, K. Kuma, and T. Miyata. 2002. 'MAFFT: a novel  
722 method for rapid multiple sequence alignment based on fast  
723 Fourier transform', *Nucleic Acids Res*, 30: 3059–66.
- 724 Kim, D., J. Y. Lee, J. S. Yang, J. W. Kim, V. N. Kim, and H. Chang.  
725 2020. 'The Architecture of SARS-CoV-2 Transcriptome', *Cell*,  
726 181: 914–21 e10.
- 727 Kokic, G., H. S. Hillen, D. Tegunov, C. Dienemann, F. Seitz, J.  
728 Schmitzova, L. Farnung, A. Siewert, C. Hobartner, and P.  
729 Cramer. 2021. 'Mechanism of SARS-CoV-2 polymerase stalling by  
730 remdesivir', *Nat Commun*, 12: 279.
- 731 Korner, R. W., M. Majjouti, M. A. A. Alcazar, and E. Mahabir. 2020.  
732 'Of Mice and Men: The Coronavirus MHV and Mouse Models as a  
733 Translational Approach to Understand SARS-CoV-2', *Viruses*, 12.
- 734 Laude, H., D. Rasschaert, B. Delmas, M. Godet, J. Gelfi, and B.  
735 Charley. 1990. 'Molecular biology of transmissible  
736 gastroenteritis virus', *Vet Microbiol*, 23: 147–54.
- 737 Lavis, L. D. 2008. 'Ester bonds in prodrugs', *ACS Chem Biol*, 3: 203–  
738 6.
- 739 Lee, C. 2015. 'Porcine epidemic diarrhea virus: An emerging and re-  
740 emerging epizootic swine virus', *Virology J*, 12: 193.
- 741 Li, Y., L. Cao, G. Li, F. Cong, Y. Li, J. Sun, Y. Luo, G. Chen, G.  
742 Li, P. Wang, F. Xing, Y. Ji, J. Zhao, Y. Zhang, D. Guo, and X.  
743 Zhang. 2021. 'Remdesivir Metabolite GS-441524 Effectively  
744 Inhibits SARS-CoV-2 Infection in Mouse Models', *J Med Chem.*
- 745 Liu, C., H. M. Ginn, W. Dejnirattisai, P. Supasa, B. Wang, A.  
746 Tuekprakhon, R. Nutalai, D. Zhou, A. J. Mentzer, Y. Zhao, H. M.  
747 E. Duyvesteyn, C. Lopez-Camacho, J. Slon-Campos, T. S. Walter,  
748 D. Skelly, S. A. Johnson, T. G. Ritter, C. Mason, S. A. Costa

749 Clemens, F. Gomes Naveca, V. Nascimento, F. Nascimento, C.  
750 Fernandes da Costa, P. C. Resende, A. Pauvolid-Correa, M. M.  
751 Siqueira, C. Dold, N. Temperton, T. Dong, A. J. Pollard, J. C.  
752 Knight, D. Crook, T. Lambe, E. Clutterbuck, S. Bibi, A.  
753 Flaxman, M. Bittaye, S. Belij-Rammerstorfer, S. C. Gilbert, T.  
754 Malik, M. W. Carroll, P. Klenerman, E. Barnes, S. J. Dunachie,  
755 V. Baillie, N. Serafin, Z. Ditse, K. Da Silva, N. G. Paterson,  
756 M. A. Williams, D. R. Hall, S. Madhi, M. C. Nunes, P. Goulder,  
757 E. E. Fry, J. Mongkolsapaya, J. Ren, D. I. Stuart, and G. R.  
758 Screaton. 2021. 'Reduced neutralization of SARS-CoV-2 B.1.617  
759 by vaccine and convalescent serum', *Cell*, 184: 4220-36 e13.

760 Lo, M. K., R. Jordan, A. Arvey, J. Sudhamsu, P. Shrivastava-Ranjan,  
761 A. L. Hotard, M. Flint, L. K. McMullan, D. Siegel, M. O.  
762 Clarke, R. L. Mackman, H. C. Hui, M. Perron, A. S. Ray, T.  
763 Cihlar, S. T. Nichol, and C. F. Spiropoulou. 2017. 'GS-5734 and  
764 its parent nucleoside analog inhibit Filo-, Pneumo-, and  
765 Paramyxoviruses', *Sci Rep*, 7: 43395.

766 Mackman, R. L., H. C. Hui, M. Perron, E. Murakami, C. Palmiotti, G.  
767 Lee, K. Stray, L. Zhang, B. Goyal, K. Chun, D. Byun, D. Siegel,  
768 S. Simonovich, V. Du Pont, J. Pitts, D. Babusis, A.  
769 Vijjapurapu, X. Lu, C. Kim, X. Zhao, J. Chan, B. Ma, D. Lye, A.  
770 Vandersteen, S. Wortman, K. T. Barrett, M. Toteva, R. Jordan,  
771 R. Subramanian, J. P. Bilello, and T. Cihlar. 2021. 'Prodrugs  
772 of a 1'-CN-4-Aza-7,9-dideazaadenosine C-Nucleoside Leading to  
773 the Discovery of Remdesivir (GS-5734) as a Potent Inhibitor of  
774 Respiratory Syncytial Virus with Efficacy in the African Green  
775 Monkey Model of RSV', *J Med Chem*, 64: 5001-17.

776 Mari, A., T. Roloff, M. Stange, K. K. Sogaard, E. Asllanaj, G.  
777 Tauriello, L. T. Alexander, M. Schweitzer, K. Leuzinger, A.  
778 Gensch, A. E. Martinez, J. Bielicki, H. Pargger, M. Siegemund,  
779 C. H. Nickel, R. Bingisser, M. Osthoff, S. Bassetti, P. Sendi,  
780 M. Battegay, C. Marzolini, H. M. B. Seth-Smith, T. Schwede, H.  
781 H. Hirsch, and A. Egli. 2021. 'Global Genomic Analysis of SARS-  
782 CoV-2 RNA Dependent RNA Polymerase Evolution and Antiviral Drug  
783 Resistance', *Microorganisms*, 9.

784 Martin, Y. C. 2005. 'A bioavailability score', *J Med Chem*, 48: 3164-  
785 70.

786 McCallum, M., J. Bassi, A. Marco, A. Chen, A. C. Walls, J. D. Iulio,  
787 M. A. Tortorici, M. J. Navarro, C. Silacci-Fregni, C. Saliba,  
788 M. Agostini, D. Pinto, K. Culap, S. Bianchi, S. Jaconi, E.  
789 Cameroni, J. E. Bowen, S. W. Tilles, M. S. Pizzuto, S. B.  
790 Guastalla, G. Bona, A. F. Pellanda, C. Garzoni, W. C. Van

791 Voorhis, L. E. Rosen, G. Snell, A. Telenti, H. W. Virgin, L.  
792 Piccoli, D. Corti, and D. Veesler. 2021. 'SARS-CoV-2 immune  
793 evasion by variant B.1.427/B.1.429', *bioRxiv*.

794 Minghua, Li., Ferretti. Max, Ying. Baoling, Descamps. H el ene, Lee.  
795 Emily, Dittmar. Mark, Lee. Jae Seung, Whig. Kanupriya, Brinda  
796 Kamalia., Dohnalov a. Lenka, Uhr. Giulia, Zarkoob. Hoda, Chen.  
797 Yu-Chi, Ramage. Holly, Ferrer. Marc, Lynch. Kristen, Schultz.  
798 David C., Christoph A. Thaiss., Diamond. Michael S., and  
799 Cherry. Sara. 2021. 'Pharmacological activation of STING blocks  
800 SARS-CoV-2 infection', *Sci Immunol*, 6.

801 Motozono, C., M. Toyoda, J. Zahradnik, A. Saito, H. Nasser, T. S.  
802 Tan, I. Ngare, I. Kimura, K. Uriu, Y. Kosugi, Y. Yue, R.  
803 Shimizu, J. Ito, S. Torii, A. Yonekawa, N. Shimono, Y.  
804 Nagasaki, R. Minami, T. Toya, N. Sekiya, T. Fukuhara, Y.  
805 Matsuura, G. Schreiber, Consortium Genotype to Phenotype Japan,  
806 T. Ikeda, S. Nakagawa, T. Ueno, and K. Sato. 2021. 'SARS-CoV-2  
807 spike L452R variant evades cellular immunity and increases  
808 infectivity', *Cell Host Microbe*, 29: 1124-36 e11.

809 Murphy, B. G., M. Perron, E. Murakami, K. Bauer, Y. Park, C.  
810 Eckstrand, M. Liepnieks, and N. C. Pedersen. 2018. 'The  
811 nucleoside analog GS-441524 strongly inhibits feline infectious  
812 peritonitis (FIP) virus in tissue culture and experimental cat  
813 infection studies', *Vet Microbiol*, 219: 226-33.

814 NCATS. 2021. 'GS-441524 Studies', National Center for Advancing  
815 Translational Sciences.  
816 <https://opendata.ncats.nih.gov/covid19/GS-441524>.

817 Oladunni, F. S., J. G. Park, P. A. Pino, O. Gonzalez, A. Akhter, A.  
818 Allue-Guardia, A. Olmo-Fontanez, S. Gautam, A. Garcia-Vilanova,  
819 C. Ye, K. Chiem, C. Headley, V. Dwivedi, L. M. Parodi, K. J.  
820 Alfson, H. M. Staples, A. Schami, J. I. Garcia, A. Whigham, R.  
821 N. Platt, 2nd, M. Gazi, J. Martinez, C. Chuba, S. Earley, O. H.  
822 Rodriguez, S. D. Mdaki, K. N. Kavelish, R. Escalona, C. R. A.  
823 Hallam, C. Christie, J. L. Patterson, T. J. C. Anderson, R.  
824 Carrion, Jr., E. J. Dick, Jr., S. Hall-Ursone, L. S.  
825 Schlesinger, X. Alvarez, D. Kaushal, L. D. Giavedoni, J.  
826 Turner, L. Martinez-Sobrido, and J. B. Torrelles. 2020.  
827 'Lethality of SARS-CoV-2 infection in K18 human angiotensin-  
828 converting enzyme 2 transgenic mice', *Nat Commun*, 11: 6122.

829 Pedersen, N. C., M. Perron, M. Bannasch, E. Montgomery, E. Murakami,  
830 M. Liepnieks, and H. Liu. 2019. 'Efficacy and safety of the  
831 nucleoside analog GS-441524 for treatment of cats with

832 naturally occurring feline infectious peritonitis', *J Feline*  
833 *Med Surg*, 21: 271-81.

834 Perlman, S., and J. Netland. 2009. 'Coronaviruses post-SARS: update  
835 on replication and pathogenesis', *Nat Rev Microbiol*, 7: 439-50.

836 Picarazzi, F., I. Vicenti, F. Saladini, M. Zazzi, and M. Mori. 2020.  
837 'Targeting the RdRp of Emerging RNA Viruses: The Structure-  
838 Based Drug Design Challenge', *Molecules*, 25.

839 Pruijssers, A. J., A. S. George, A. Schafer, S. R. Leist, L. E.  
840 Gralinski, K. H. Dinno, 3rd, B. L. Yount, M. L. Agostini, L.  
841 J. Stevens, J. D. Chappell, X. Lu, T. M. Hughes, K. Gully, D.  
842 R. Martinez, A. J. Brown, R. L. Graham, J. K. Perry, V. Du  
843 Pont, J. Pitts, B. Ma, D. Babusis, E. Murakami, J. Y. Feng, J.  
844 P. Bilello, D. P. Porter, T. Cihlar, R. S. Baric, M. R.  
845 Denison, and T. P. Sheahan. 2020. 'Remdesivir Inhibits SARS-  
846 CoV-2 in Human Lung Cells and Chimeric SARS-CoV Expressing the  
847 SARS-CoV-2 RNA Polymerase in Mice', *Cell Rep*, 32: 107940.

848 Reardon, S. 2021. 'How the Delta variant achieves its ultrafast  
849 spread', *Nature*.

850 Robson, F., K. S. Khan, T. K. Le, C. Paris, S. Demirbag, P. Barfuss,  
851 P. Rocchi, and W. L. Ng. 2020. 'Coronavirus RNA Proofreading:  
852 Molecular Basis and Therapeutic Targeting', *Mol Cell*, 79: 710-  
853 27.

854 Sabbah, D. A., R. Hajjo, S. K. Bardaweel, and H. A. Zhong. 2021. 'An  
855 Updated Review on SARS-CoV-2 Main Proteinase (M(Pro)): Protein  
856 Structure and Small-Molecule Inhibitors', *Curr Top Med Chem*,  
857 21: 442-60.

858 Salleh, M. Z., J. P. Derrick, and Z. Z. Deris. 2021. 'Structural  
859 Evaluation of the Spike Glycoprotein Variants on SARS-CoV-2  
860 Transmission and Immune Evasion', *Int J Mol Sci*, 22.

861 Shu, Y., and J. McCauley. 2017. 'GISAID: Global initiative on sharing  
862 all influenza data - from vision to reality', *Euro Surveill*,  
863 22.

864 Sun, J., Z. Zhuang, J. Zheng, K. Li, R. L. Wong, D. Liu, J. Huang, J.  
865 He, A. Zhu, J. Zhao, X. Li, Y. Xi, R. Chen, A. N. Alshukairi,  
866 Z. Chen, Z. Zhang, C. Chen, X. Huang, F. Li, X. Lai, D. Chen,  
867 L. Wen, J. Zhuo, Y. Zhang, Y. Wang, S. Huang, J. Dai, Y. Shi,  
868 K. Zheng, M. R. Leidinger, J. Chen, Y. Li, N. Zhong, D. K.  
869 Meyerholz, P. B. McCray, Jr., S. Perlman, and J. Zhao. 2020a.  
870 'Generation of a Broadly Useful Model for COVID-19  
871 Pathogenesis, Vaccination, and Treatment', *Cell*, 182: 734-43  
872 e5.



- 873 Sun, S. H., Q. Chen, H. J. Gu, G. Yang, Y. X. Wang, X. Y. Huang, S.  
874 S. Liu, N. N. Zhang, X. F. Li, R. Xiong, Y. Guo, Y. Q. Deng, W.  
875 J. Huang, Q. Liu, Q. M. Liu, Y. L. Shen, Y. Zhou, X. Yang, T.  
876 Y. Zhao, C. F. Fan, Y. S. Zhou, C. F. Qin, and Y. C. Wang.  
877 2020b. 'A Mouse Model of SARS-CoV-2 Infection and  
878 Pathogenesis', *Cell Host Microbe*, 28: 124-33 e4.
- 879 Tegally, H., E. Wilkinson, M. Giovanetti, A. Iranzadeh, V. Fonseca,  
880 J. Giandhari, D. Doolabh, S. Pillay, E. J. San, N. Msomi, K.  
881 Mlisana, A. von Gottberg, S. Walaza, M. Allam, A. Ismail, T.  
882 Mohale, A. J. Glass, S. Engelbrecht, G. Van Zyl, W. Preiser, F.  
883 Petruccione, A. Sigal, D. Hardie, G. Marais, N. Y. Hsiao, S.  
884 Korsman, M. A. Davies, L. Tyers, I. Mudau, D. York, C. Maslo,  
885 D. Goedhals, S. Abrahams, O. Laguda-Akingba, A. Alisoltani-  
886 Dehkordi, A. Godzik, C. K. Wibmer, B. T. Sewell, J. Lourenco,  
887 L. C. J. Alcantara, S. L. Kosakovsky Pond, S. Weaver, D.  
888 Martin, R. J. Lessells, J. N. Bhiman, C. Williamson, and T. de  
889 Oliveira. 2021. 'Detection of a SARS-CoV-2 variant of concern  
890 in South Africa', *Nature*, 592: 438-43.
- 891 Teyssou, E., H. Delagrèverie, B. Visseaux, S. Lambert-Niclot, S.  
892 Briclher, V. Ferre, S. Marot, A. Jary, E. Todesco, A.  
893 Schnuriger, E. Ghidaoui, B. Abdi, S. Akhavan, N. Houhou-Fidouh,  
894 C. Charpentier, L. Morand-Joubert, D. Boutolleau, D. Descamps,  
895 V. Calvez, A. G. Marcelin, and C. Soulie. 2021. 'The Delta  
896 SARS-CoV-2 variant has a higher viral load than the Beta and  
897 the historical variants in nasopharyngeal samples from newly  
898 diagnosed COVID-19 patients', *J Infect.*
- 899 Vuong, W., C. Fischer, M. B. Khan, M. J. van Belkum, T. Lamer, K. D.  
900 Willoughby, J. Lu, E. Arutyunova, M. A. Joyce, H. A. Saffran,  
901 J. A. Shields, H. S. Young, J. A. Nieman, D. L. Tyrrell, M. J.  
902 Lemieux, and J. C. Vederas. 2021. 'Improved SARS-CoV-2 M(pro)  
903 inhibitors based on feline antiviral drug GC376: Structural  
904 enhancements, increased solubility, and micellar studies', *Eur*  
905 *J Med Chem*, 222: 113584.
- 906 Wahl, A., L. E. Gralinski, C. E. Johnson, W. Yao, M. Kovarova, K. H.  
907 Dinno, 3rd, H. Liu, V. J. Madden, H. M. Krzystek, C. De, K. K.  
908 White, K. Gully, A. Schafer, T. Zaman, S. R. Leist, P. O.  
909 Grant, G. R. Bluemling, A. A. Kolykhalov, M. G. Natchus, F. B.  
910 Askin, G. Painter, E. P. Browne, C. D. Jones, R. J. Pickles, R.  
911 S. Baric, and J. V. Garcia. 2021. 'SARS-CoV-2 infection is  
912 effectively treated and prevented by EIDD-2801', *Nature*, 591:  
913 451-57.

- 914 Wang, M., R. Cao, L. Zhang, X. Yang, J. Liu, M. Xu, Z. Shi, Z. Hu, W.  
915 Zhong, and G. Xiao. 2020a. 'Remdesivir and chloroquine  
916 effectively inhibit the recently emerged novel coronavirus  
917 (2019-nCoV) in vitro', *Cell Res*, 30: 269-71.
- 918 Wang, Q., J. Wu, H. Wang, Y. Gao, Q. Liu, A. Mu, W. Ji, L. Yan, Y.  
919 Zhu, C. Zhu, X. Fang, X. Yang, Y. Huang, H. Gao, F. Liu, J. Ge,  
920 Q. Sun, X. Yang, W. Xu, Z. Liu, H. Yang, Z. Lou, B. Jiang, L.  
921 W. Guddat, P. Gong, and Z. Rao. 2020b. 'Structural Basis for  
922 RNA Replication by the SARS-CoV-2 Polymerase', *Cell*, 182: 417-  
923 28 e13.
- 924 Wang, Y., R. Chen, F. Hu, Y. Lan, Z. Yang, C. Zhan, J. Shi, X. Deng,  
925 M. Jiang, S. Zhong, B. Liao, K. Deng, J. Tang, L. Guo, M.  
926 Jiang, Q. Fan, M. Li, J. Liu, Y. Shi, X. Deng, X. Xiao, M.  
927 Kang, Y. Li, W. Guan, Y. Li, S. Li, F. Li, N. Zhong, and X.  
928 Tang. 2021. 'Transmission, viral kinetics and clinical  
929 characteristics of the emergent SARS-CoV-2 Delta VOC in  
930 Guangzhou, China', *EClinicalMedicine*, 40: 101129.
- 931 Wei, D., T. Hu, Y. Zhang, W. Zheng, H. Xue, J. Shen, Y. Xie, and H.  
932 A. Aisa. 2021. 'Potency and pharmacokinetics of GS-441524  
933 derivatives against SARS-CoV-2', *Bioorg Med Chem*, 46: 116364.
- 934 Weiss, S. R., and J. L. Leibowitz. 2011. 'Coronavirus pathogenesis',  
935 *Adv Virus Res*, 81: 85-164.
- 936 WHO. 2021a. 'SARS-CoV-2 Variants, Working Definitions and Actions  
937 Taken'. [https://www.who.int/en/activities/tracking-SARS-CoV-2-  
938 variants](https://www.who.int/en/activities/tracking-SARS-CoV-2-variants).
- 939 ———. 2021b. 'WHO Coronavirus (COVID-19) Dashboard'.  
940 <https://covid19.who.int>.
- 941 Wu, F., S. Zhao, B. Yu, Y. M. Chen, W. Wang, Z. G. Song, Y. Hu, Z. W.  
942 Tao, J. H. Tian, Y. Y. Pei, M. L. Yuan, Y. L. Zhang, F. H. Dai,  
943 Y. Liu, Q. M. Wang, J. J. Zheng, L. Xu, E. C. Holmes, and Y. Z.  
944 Zhang. 2020. 'A new coronavirus associated with human  
945 respiratory disease in China', *Nature*, 579: 265-69.
- 946 Yin, W., X. Luan, Z. Li, Y. Xie, Z. Zhou, J. Liu, M. Gao, X. Wang, F.  
947 Zhou, Q. Wang, Q. Wang, D. Shen, Y. Zhang, G. Tian, Haji A.  
948 Aisa, T. Hu, D. Wei, Y. Jiang, G. Xiao, H. Jiang, L. Zhang, X.  
949 Yu, J. Shen, S. Zhang, and H. E. Xu. 2020a. 'Structural basis  
950 for repurpose and design of nucleoside drugs for treating  
951 COVID-19'.
- 952 Yin, W., C. Mao, X. Luan, D. D. Shen, Q. Shen, H. Su, X. Wang, F.  
953 Zhou, W. Zhao, M. Gao, S. Chang, Y. C. Xie, G. Tian, H. W.  
954 Jiang, S. C. Tao, J. Shen, Y. Jiang, H. Jiang, Y. Xu, S. Zhang,  
955 Y. Zhang, and H. E. Xu. 2020b. 'Structural basis for inhibition

956 of the RNA-dependent RNA polymerase from SARS-CoV-2 by  
957 remdesivir', *Science*, 368: 1499–504.  
958 Zhang, Q., R. Xiang, S. Huo, Y. Zhou, S. Jiang, Q. Wang, and F. Yu.  
959 2021. 'Molecular mechanism of interaction between SARS-CoV-2  
960 and host cells and interventional therapy', *Signal Transduct*  
961 *Target Ther*, 6: 233.  
962 Zhang, Y., J. Sun, Y. Sun, Y. Wang, and Z. He. 2013. 'Prodrug design  
963 targeting intestinal PepT1 for improved oral absorption: design  
964 and performance', *Curr Drug Metab*, 14: 675–87.  
965 Zhou, P., H. Fan, T. Lan, X. L. Yang, W. F. Shi, W. Zhang, Y. Zhu, Y.  
966 W. Zhang, Q. M. Xie, S. Mani, X. S. Zheng, B. Li, J. M. Li, H.  
967 Guo, G. Q. Pei, X. P. An, J. W. Chen, L. Zhou, K. J. Mai, Z. X.  
968 Wu, D. Li, D. E. Anderson, L. B. Zhang, S. Y. Li, Z. Q. Mi, T.  
969 T. He, F. Cong, P. J. Guo, R. Huang, Y. Luo, X. L. Liu, J.  
970 Chen, Y. Huang, Q. Sun, X. L. Zhang, Y. Y. Wang, S. Z. Xing, Y.  
971 S. Chen, Y. Sun, J. Li, P. Daszak, L. F. Wang, Z. L. Shi, Y. G.  
972 Tong, and J. Y. Ma. 2018. 'Fatal swine acute diarrhoea syndrome  
973 caused by an HKU2-related coronavirus of bat origin', *Nature*,  
974 556: 255–58.  
975

## 976 **Figure legends**

### 977 **Figure 1. The chemical structure and synthesis of 69-0 prodrugs.**

978 Reagent and condition: i) anhydrides, DMAP, EDMA, ACN, 40 °C, 0.5 h; ii) 2,2-  
979 Dimethoxypropane, Conc. H<sub>2</sub>SO<sub>4</sub>, Acetone, rt~45 °C, 4 h; iii) carboxylic acid, DCC,  
980 DMAP, DCM, rt, 12 h; iv) 6 N HCl, THF, 0 °C, 7 h.

### 981 **Figure 2. Antiviral activity of compounds against SARS-CoV-2 variants (B.1, Beta 982 and Delta) in Vero E6 cells.**

983 Vero-E6 cells were infected with different strains of SARS-CoV-2 variant (B.1, Beta  
984 and Delta) at an MOI of 0.05 and treated with dilutions of compounds (0, 0.01, 0.1, 0.5,  
985 1, 2, 5, 10 and 50 µM) for 48 h. Viral yield in the cell supernatant was then quantified  
986 by qRT-PCR. The values of EC<sub>50</sub> of each compound were analyzed.

### 987 **Figure 3. Pharmacokinetic profile of ATV006 in SD rats and cynomolgus monkeys.**

988 (A) Time-plasma concentration curve of the nucleoside following single IV (4mg/kg)  
989 or IG (20 mg/kg) administration of ATV006 to SD rats (n = 3, Mean  $\pm$  SD). (B) Plasma  
990 concentration of the nucleoside following single IV (5 mg/kg) or IG (10 mg/kg)  
991 administration to cynomolgus monkeys (n = 3, Mean  $\pm$  SD). (C) Tissue distribution of  
992 the parent nucleoside followed a single oral dose of 100 mg/kg ATV006 to C57BL/6  
993 mice (n = 5, Mean  $\pm$  SD).

994 **Figure 4. Anti-SARS-CoV-2 efficacy of ATV006 in hACE2 humanized and Ad5-**  
995 **hACE2 mouse model.**

996 (A) Schematic of the experiment viral infection in hACE2 humanized mice. hACE2  
997 humanized mice were intranasally inoculated with B.1 original strain of SARS-CoV-2  
998 ( $2 \times 10^5$  PFU virus per mouse) and were administered with vehicle (control), ATV006  
999 (250 mg/kg, IG, once daily), ATV006 (500 mg/kg, IG, once daily). Viral titers in the  
1000 lungs at 4 dpi were measured by qRT-PCR analysis of gRNA N (B) and sgRNA N (C)  
1001 of SARS-CoV-2. (D) Schematic of the experiment viral infection in Ad5-hACE2 mice.  
1002 B.1 original strain of SARS-CoV-2 ( $1 \times 10^5$  PFU virus per mouse) infected Ad5-hACE2  
1003 mice were administered with vehicle (control), ATV006 (250 mg/kg, IG, once daily),  
1004 EIDD-2801 (500 mg/kg, IG, once daily) beginning at -2 hpi. (E) Viral titers in the lungs  
1005 of treated or untreated Ad5-hACE2 mice at 2 dpi were measured by plaque assay. (F)  
1006 Histopathology analysis of lung from vehicle group and ATV006 (250 mg/kg) group at  
1007 4 dpi. \*p values  $\leq$  0.05; \*\*p values  $\leq$  0.005; \*\*\*p values  $\leq$  0.0005; \*\*\*\*p values  $\leq$   
1008 0.0001.

1009 **Figure 5. Anti-SARS-CoV-2 Delta variant efficacy of ATV006 in K18 hACE2**  
1010 **mouse model.**

1011 (A) Schematic of the experiment. K18 hACE2 mice were intranasally inoculated with  
1012 SARS-CoV-2 Delta variant ( $1 \times 10^4$  plaque forming units (PFU) virus per mouse) and  
1013 were treated with vehicle (control, n=11), ATV006 (250 mg/kg, IG, once daily, n=11),  
1014 ATV006 (100 mg/kg, IG, once daily, n=8) or EIDD-2801 (500 mg/kg, IG, once daily,

1015 n=8). (B) Survival curve. (C) Body weight curve. (D) Viral titers from lungs and brains  
1016 tissue were harvested at 3 dpi and analyzed by qRT-PCR. Histopathology (F, H) and  
1017 gross pathology (E, G) of lungs and spleens from vehicle group and ATV006 (250  
1018 mg/kg, IG, once daily). (I) Representative chemokines and cytokines assessment of the  
1019 lung tissues harvested at 3 dpi of the vehicle group and 250 mg/kg ATV006 group.  
1020 Total RNA were extracted from lung homogenates and IFN- $\beta$ , IFN- $\gamma$ , CXCL10 and  
1021 CCL2 were analyzed by qRT-PCR. \*p values  $\leq$  0.05; \*\*p values  $\leq$  0.005; \*\*\*p values  
1022  $\leq$  0.0005; \*\*\*\*p values  $\leq$  0.0001.

1023 **Figure 6. ATV006 has broad-spectrum antiviral activity among different**  
1024 **coronaviruses.**

1025 (A) L2 cells were infected with MHV-A59 at a multiplicity of infection (MOI) of 0.1  
1026 and treated with dilutions of remdesivir, 69-0 and ATV006. Antiviral activities were  
1027 evaluated by qRT-PCR quantification of a viral copy numbers in the cultured  
1028 supernatant after 16 h post infection. (B-F) The values of EC<sub>50</sub> of ATV006 in (FIPV,  
1029 CCoV, PEDV, TGEV and SADS) were analyzed.

1030 **Figure 7. Anti-viral efficacy of ATV006 against MHV in vivo.**

1031 (A) Schematic of the experiment. 5 weeks Balb/c mouse were intranasally inoculated  
1032 with  $1 \times 10^6$  PFU per mouse of MHV-A59, and treated with vehicle (control, n=5) and  
1033 ATV006 (500, 250, 100, 50 mg/kg, IG, twice daily, n=5 per group). (B) Body weight.  
1034 (C, D, E, F) Viral titers from lungs and livers tissue were harvested at 2 dpi and analyzed  
1035 by plaque assay and qRT-PCR. (G) Histopathology analysis of lung from vehicle group  
1036 and ATV006 (500 mg/kg, IG, twice daily). (H) Representative chemokine and cytokine  
1037 assessment of the lung tissues of the indicated groups, as detected in lung tissue  
1038 homogenate at 2 dpi. \*p values  $\leq$  0.05; \*\*p values  $\leq$  0.005; \*\*\*p values  $\leq$  0.0005; \*\*\*\*p  
1039 values  $\leq$  0.0001.

1040 **Figure S1. Antiviral activity of 21 compounds in SARS-CoV-2 Replicon system.**

1041 (A) HEK 293T cells transfected with SARS-CoV-2-Rep-Luci were treated with DMSO  
1042 and 24 compounds with 10  $\mu$ M. 60 h post-transfection, the cells were subjected to the  
1043 Dual-Luciferase® Reporter (DLR™) Assay.

1044 (B) The values of EC<sub>50</sub> of each compound were analyzed.

1045 **Figure S2. Antiviral activity of compounds against SARS-CoV-2 (B.1) in Huh7**  
1046 **cells.**

1047 Huh7 cells were infected with B.1 original strain SARS-CoV-2 at an MOI of 0.05 and  
1048 treated with dilutions of each compound (0, 0.01, 0.1, 0.5, 1, 2, 5 and 10  $\mu$ M) for 48 h.  
1049 Viral yield in the cultured supernatant was then quantified by qRT-PCR. The values of  
1050 EC<sub>50</sub> of each compound was analyzed.

1051 **Figure S3. Cytotoxicity assay of compounds.**

1052 Vero-E6 cells were plated in 96-well plate and treated with increasing concentrations  
1053 compound ranging from 0 to 200  $\mu$ M for 48 h. Cell viability was tested using Cell  
1054 Counting Kit-8 (CCK-8). (A) ATV006. (B) other compounds.

1055 **Figure S4. Genomic RNA (gRNA) and Subgenomic RNA (sgRNA) of Coronavirus.**

1056 Detect the target position of the primer/probe sets of genomic RNA (gRNA) and  
1057 subgenomic RNA (sgRNA) of Coronavirus. In this article, only FP and RP were used  
1058 to detect sgRNA of SARS-CoV-2, and no Prb was used. The sequences of primer/probe  
1059 sets are listed in Table S3.

1060 **Figure S5. Dose-response in vivo anti-MHV efficacy of ATV006, remdesivir and**  
1061 **69-0 via intranasal inoculation.**

1062 (A) Schematic of the experiment. Mouse were divided them into the following groups:  
1063 vehicle (control), ATV006 (50, 20, 10, 5, 2 mg/kg, IG, once daily), remdesivir (20  
1064 mg/kg, IV, once daily) or 69-0 (50 mg/kg, IG, once daily). After MHV-A59 infects the  
1065 mice, the administration is continued for 4 days, and the body weight curve (C) and

1066 survival curve (B) of the mice were recorded for 14 days. (D) Viral titers from livers  
1067 were harvested at 3 dpi and analyzed by qRT-PCR.

1068 **Figure S6. Dose-response anti-HMV efficacy of ATV006 via intrahepatic**  
1069 **inoculation.**

1070 (A) Schematic of the experiment. 5 weeks Balb/c mouse were intranasally  
1071 intrahepatic with  $1 \times 10^5$  PFU per mouse of MHV-A59, and treated with vehicle  
1072 (control), ATV006 (50,10, 2 mg/kg, IG, twice daily). (B, C and D) Viral titers from  
1073 liver tissue were harvested at 3 dpi and analyzed by plaque assay and qRT-PCR. (E  
1074 and F) ALT and AST analysis of serum from vehicle group and ATV006 (50 mg/kg,  
1075 IG, twice daily). (G) Histopathology analysis of liver from vehicle group and  
1076 ATV006 (50 mg/kg, IG, twice daily). (H) Representative chemokine and cytokine  
1077 assessment of the liver tissues of the indicated groups, as detected in lung tissue  
1078 homogenate at 3 dpi. \*p values  $\leq 0.05$ ; \*\*p values  $\leq 0.005$ ; \*\*\*p values  $\leq 0.0005$ ; \*  
1079 \*\*\*p values  $\leq 0.0001$ .

1080 **Figure S7. Analysis of RdRp mutation of SARS-CoV-2 and its variants.**

1081 The black triangles represent the key sites where remdesivir binds to RdRp. The red  
1082 triangles represent the enzyme activity amino acid residues of RdRp. The red dots  
1083 represent the amino acid sites whose mutation rate is greater than one percent and less  
1084 than eighty percent compared with the original strain. The blue dots represent the amino  
1085 acid sites whose mutation rate is greater than eighty percent compared with the original  
1086 strain.

1087 **Figure S8. Coronavirus RdRp Conservation Analysis.**

1088 Coronavirus RdRp amino acid sequence alignment, (A) Alpha-coronavirus and (B)  
1089 beta-coronavirus. The black dots represent the key sites where remdesivir binds to  
1090 RdRp. The red triangles represent the enzyme activity amino acid residues of RdRp.  
1091



1092 **Tables**

1093

1094 **Table 1.** Anti-SARS-CoV-2 activity and cytotoxicity of the adenosine analogue  
1095 prodrugs in comparison with remdesivir and 69-0

1096

| Compound   | EC <sub>50</sub> (μM) in Vero E6 cells |                            |                               | CC <sub>50</sub> (μM) |
|------------|----------------------------------------|----------------------------|-------------------------------|-----------------------|
|            | SARS-CoV-2 (B.1)                       | SARS-CoV-2 (Beta, B.1.351) | SARS-CoV-2 (Delta, B.1.617.2) |                       |
| Remdesivir | 2.279                                  | 1.780                      | 1.645                         | >50                   |
| 69-0       | 1.709                                  | 1.354                      | 0.957                         | >50                   |
| ATV006     | 1.360                                  | 1.127                      | 0.349                         | 128.00                |
| ATV009     | 1.329                                  | 1.484                      | 0.492                         | >50                   |
| ATV010     | 0.696                                  | 1.002                      | 0.457                         | 44.62                 |
| ATV011     | 2.117                                  | 2.302                      | 0.408                         | >50                   |
| ATV013     | 2.262                                  | 2.434                      | 0.965                         | >50                   |
| ATV017     | 2.188                                  | 2.847                      | 0.428                         | >50                   |

1097

1098

1099 **Table 2.** Pharmacokinetic profile of ATV006 in Sprague-Dawley (SD) rat and  
1100 cynomolgus monkey <sup>a</sup>

| parameters                   | rat         |              | monkey      |              |
|------------------------------|-------------|--------------|-------------|--------------|
|                              | IV (4mg/kg) | IG (20mg/kg) | IV (5mg/kg) | IG (10mg/kg) |
| AUC <sub>last</sub> (μg/L*h) | 2347±354    | 11445±813    | 5960±490    | 3560±245     |
| T <sub>1/2</sub> (h)         | 1.30±0.24   | 3.62±0.61    | 1.78±0.6    | 4.08±0.94    |
| T <sub>max</sub> (h)         | 0.083       | 0.83±0.29    | 0.083       | 1.50±2.20    |
| C <sub>max</sub> (μg/L)      | 3030+451    | 4017±359     | 3730±709    | 1080±651     |
| F (%)                        |             | 98%          |             | 30.08%       |

1101

1102

1103

1104

1105

1106 **Table S1.** Permeability and efflux ratio determination of 69-0, ATV006, ATV019 and  
1107 ATV020 in Caco-2 cells

| Compound | Caco-2 AB/BA (Papp (10 <sup>-6</sup> cm/s)) <sup>a</sup> | Efflux ratio |
|----------|----------------------------------------------------------|--------------|
| 69-0     | 1.22/1.20                                                | 0.98         |
| ATV006   | 0.51/0.87                                                | 1.7          |

|        |           |      |
|--------|-----------|------|
| ATV019 | 0.28/0.68 | 2.47 |
| ATV020 | 0.17/0.22 | 1.28 |

1108

1109 <sup>a</sup> Papp (A to B) < 2, low permeability; 2 < Papp (A to B) < 10, moderate permeability;

1110 Papp (A to B) > 10, high permeability.

1111

1112

1113 **Table S2.** Animal coronaviruses and cells used in this study

| Virus                                                | Cell line                                         | Concentrations for ATV006     | Virus strain                                                                  |
|------------------------------------------------------|---------------------------------------------------|-------------------------------|-------------------------------------------------------------------------------|
| Canine coronavirus (CCV)                             | Feline kidney cells (CRFK cells)                  | ranging from 0.1 μM to 50 μM  | ATCC-VR-2068                                                                  |
| Porcine epidemic diarrhea virus (PEDV)               | African green monkey kidney cells (Vero E6 cells) | ranging from 0.1 μM to 50 μM  | isolated by our lab                                                           |
| Transmissible gastroenteritis virus (TGEV)           | swine testicle cells (ST cells)                   | ranging from 0.5 μM to 100 μM | ATCC-VR-1740                                                                  |
| Swine acute diarrhea syndrome coronavirus (SADS-CoV) | African green monkey kidney cells (Vero E6 cells) | ranging from 0.5 μM to 100 μM | SADS-CoV/CN/GDST/2017                                                         |
| Feline infectious peritonitis virus (FIPV)           | Feline kidney cells (CRFK cells)                  | ranging from 0.1 μM to 100 μM | ATCC-VR-2128                                                                  |
| Mouse hepatitis virus (MHV)                          | Rat lung epithelial cells (L2 cells)              | ranging from 0.01 μM to 10 μM | were kindly provided by Rong Ye (Shanghai Medical School of Fudan University) |

1114

1115

1116 **Table S3.** qPCR primers used for detection of viral genomes and various genes

| Gene           |     | Sequence(5'-3')            |
|----------------|-----|----------------------------|
| DA'AN          | FP  | AAGAAATTCAACTCCAGGCAGC     |
| SARS-COV-2-N   | RP  | GCTGGTTCAATCTGTCAAGCAG     |
|                | Prb | TCACCGCCATTGCCAGCCA        |
| SARS-COV-2 sgN | FP  | CCAGGTAACAAACCAACAA        |
|                | RP  | TGAGTGAGAGCGGTGAACCAA      |
| MHV-A59-N      | FP  | GGAAGTCTCTCGTTGGGCATTATACT |

|                 |     |                               |
|-----------------|-----|-------------------------------|
|                 | RP  | ACCACAAGATTATCATTTTCACAACATA  |
|                 | Prb | ACATGCTACGGCTCGTGTAACCGAACTGT |
| MHV-A59- sgN    | FP  | TATAAGAGTGATTGGCGTCC          |
|                 | RP  | GAGTAATGGGGAACCACACT          |
|                 | Prb | ACATGCTACGGCTCGTGTAACCGAACTGT |
| m-GAPDH         | FP  | AGAACATCATCCCTGCATCC          |
|                 | RP  | CACATTGGGGGTAGGAACAC          |
| m-IL-6          | FP  | AACCAAGAGATAAGCTGGAGTCAC      |
|                 | RP  | AACGCACTAGGTTTGCCGAG          |
| m-IL1 $\beta$   | FP  | TGCCACCTTTTGACAGTGATGA        |
|                 | RP  | ATCAGGACAGCCCAGGTCAA          |
| m-CXCL-10       | FP  | TGCAGGATGATGGTCAAGCC          |
|                 | RP  | CCACTTGAGCGAGGACTCAG          |
| m-IFN- $\gamma$ | FP  | CAGCAAGGCGAAAAAGGATGC         |
|                 | RP  | CTTCCTGAGGCTGGATTCCG          |
| m-IFN- $\beta$  | FP  | GTGGGAGATGTCCTCAACTGC         |
|                 | RP  | TCTCTGCTCGGACCACCATC          |
| m-CCL2          | FP  | TGGGCCTGTTGTTACAGT            |
|                 | RP  | TTCTCCAGCCGACTCATTG           |
| FIPV            | FP  | AGCAACTACTGCCACRGGAT          |
|                 | RP  | GGAAGGTTTCATCTCCCCAGT         |
|                 | Prb | AATGGCCACACAGGGACAACGC        |
| CCoV,           | FP  | CAGTCTAGAAATAGATCTCAATC       |
|                 | RP  | GCTTGTTCTACACTGTCA            |
|                 | Prb | CCTTCTTGTTATTGGATTGTTGCCTTC   |
| PEDV            | FP  | CGCAAAGACTGAACCCACTAATTT      |
|                 | RP  | TGCTCTGTTGTTACTTGGAGAT        |
|                 | Prb | TGTTGCCATTGCCACGACTCCTGC      |
| TGEV            | FP  | GCAGGTAAAGGTGATGTGACAA        |
|                 | RP  | ACATTCAGCCAGTTGTGGGTAA        |
|                 | Prb | TGGCACTGCTGGGATTGGCAACGA-     |
| SADS            | FP  | CTGACTGTTGTTGAGGTTAC          |
|                 | RP  | TCTGCCAAAGCTTGTTTAAC          |
|                 | Prb | TCACAGTCTCGTTCTCGCAATCA       |

1118

1119

1120

**Table S4.** Viral genome sequences and accession numbers

| <b>Viruses</b>                                               | <b>Accession Number</b> |
|--------------------------------------------------------------|-------------------------|
| Feline Infectious Peritonitis Virus (FIPV)                   | YP_004070193.2          |
| Bat coronavirus 1B (BCoV-1B)                                 | ACA52156.1              |
| bat coronavirus 512 (Sc-BatCoV-512)                          | YP_001351683.1          |
| bat coronavirus HKU2 (BCHV2)                                 | ABB77027.1              |
| bat coronavirus HKU6 (BatCoVHKU6)                            | ABB77038.1              |
| bat coronavirus HKU7 (BatCoVHKU7)                            | ABB77040.1              |
| bat coronavirus HKU8 (BatCoVHKU8)                            | YP_001718610.1          |
| Canine coronavirus (CCoV)                                    | AEQ61967.2              |
| Ferret coronavirus (FRCoV)                                   | AKG92638.1              |
| Human coronavirus 229E (HCoV-229E)                           | NP_073549.1             |
| Human coronavirus NL63 (HCoV-NL63)                           | YP_003766.2             |
| Porcine epidemic diarrhea virus (PEDV)                       | NP_598309.2             |
| Transmissible gastroenteritis virus (TGEV)                   | NP_058422.1             |
| Severe acute respiratory syndrome coronavirus 2 (SARS-CoV-2) | YP_009724389.1          |
| Severe acute respiratory syndrome coronavirus (SARS)         | NP_828849.7             |
| Swine acute diarrhea syndrome coronavirus (SADS-CoV)         | QJF53984.1              |
| bat coronavirus HKU5(BatCoVHKU5)                             | YP_001039961.1          |
| Bovine coronavirus (BCoV)                                    | AAL57305.1              |
| Human coronavirus OC43 (HCoV-OC43)                           | YP_009555238.1          |
| Rousettus bat coronavirus HKU9 (BatCoVHKU9)                  | YP_009924393.1          |
| Human coronavirus HKU1(HCHV1)                                | YP_173236.1             |
| Middle East respiratory syndrome-related coronavirus (MERS)  | YP_009047202.1          |
| Mouse hepatitis virus (MHV)                                  | AAB86818.1              |

Lucheng Rn rat coronavirus (LRNV)

QDL88264.1

---

1121

1122

1123

## Figures

**Figure 1. The chemical structure and synthesis of 69-0 prodrugs.**

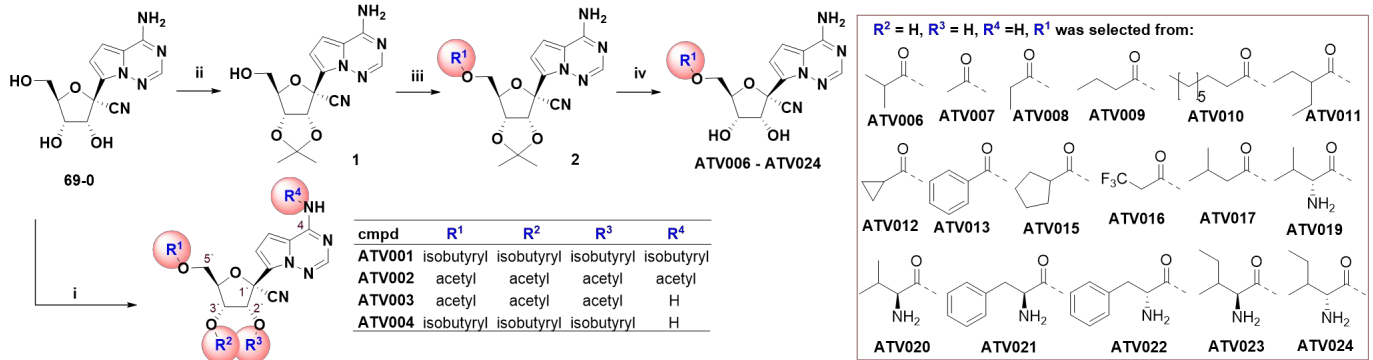

**Figure 2. Antiviral activity of the compounds against SARS-CoV-2 variants (B.1, Beta and Delta) in Vero E6 cells.**

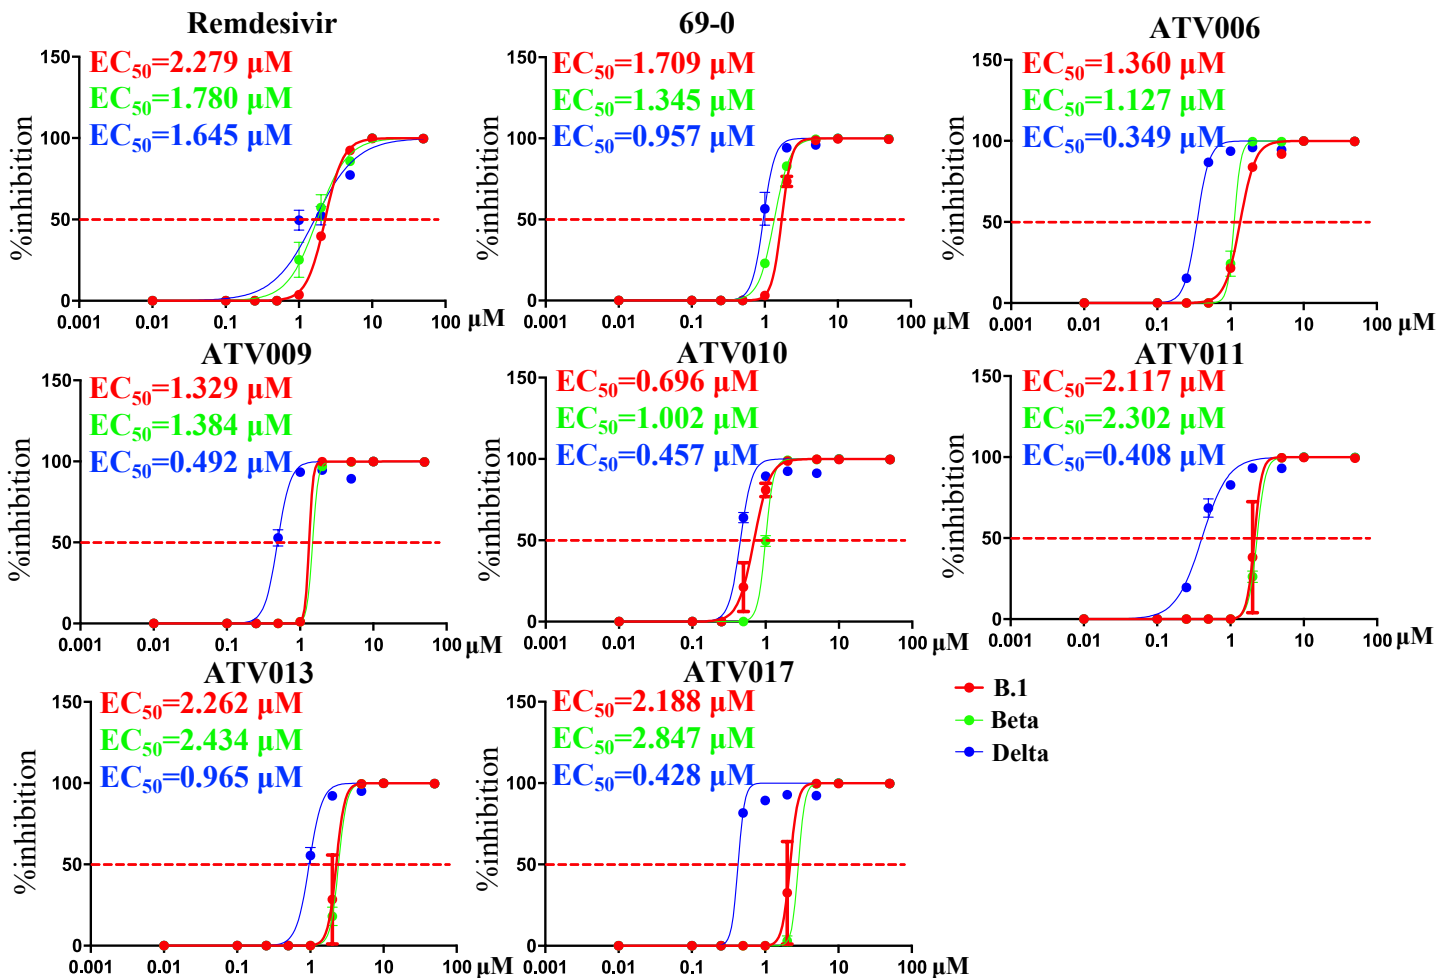

### Figure 3. Pharmacokinetic profile of ATV006 in SD rats and cynomolgus monkeys.

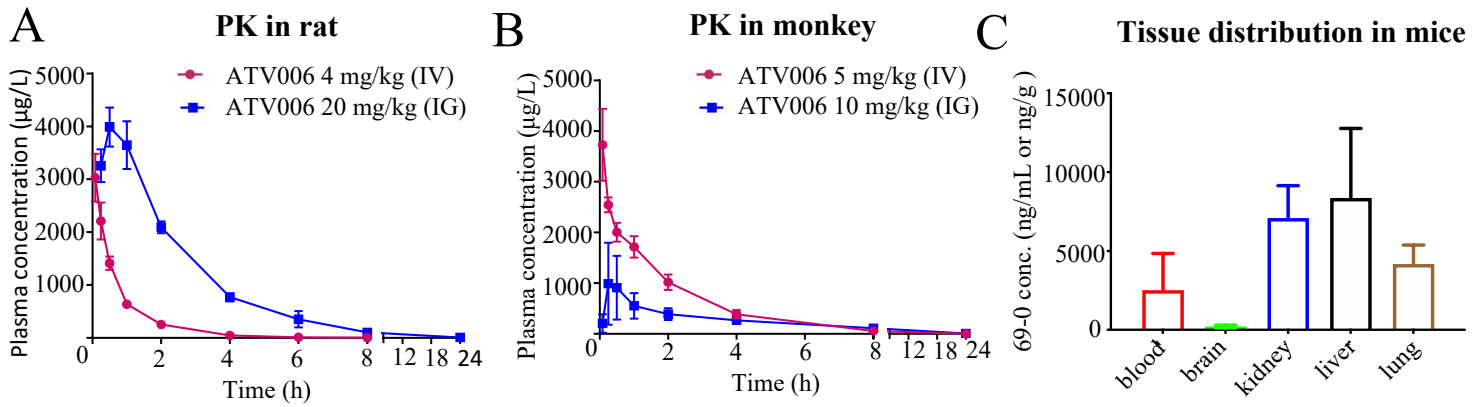

### Figure 4. Anti-SARS-CoV-2 efficacy of ATV006 in hACE2 humanized and Ad5-hACE2 mouse model.

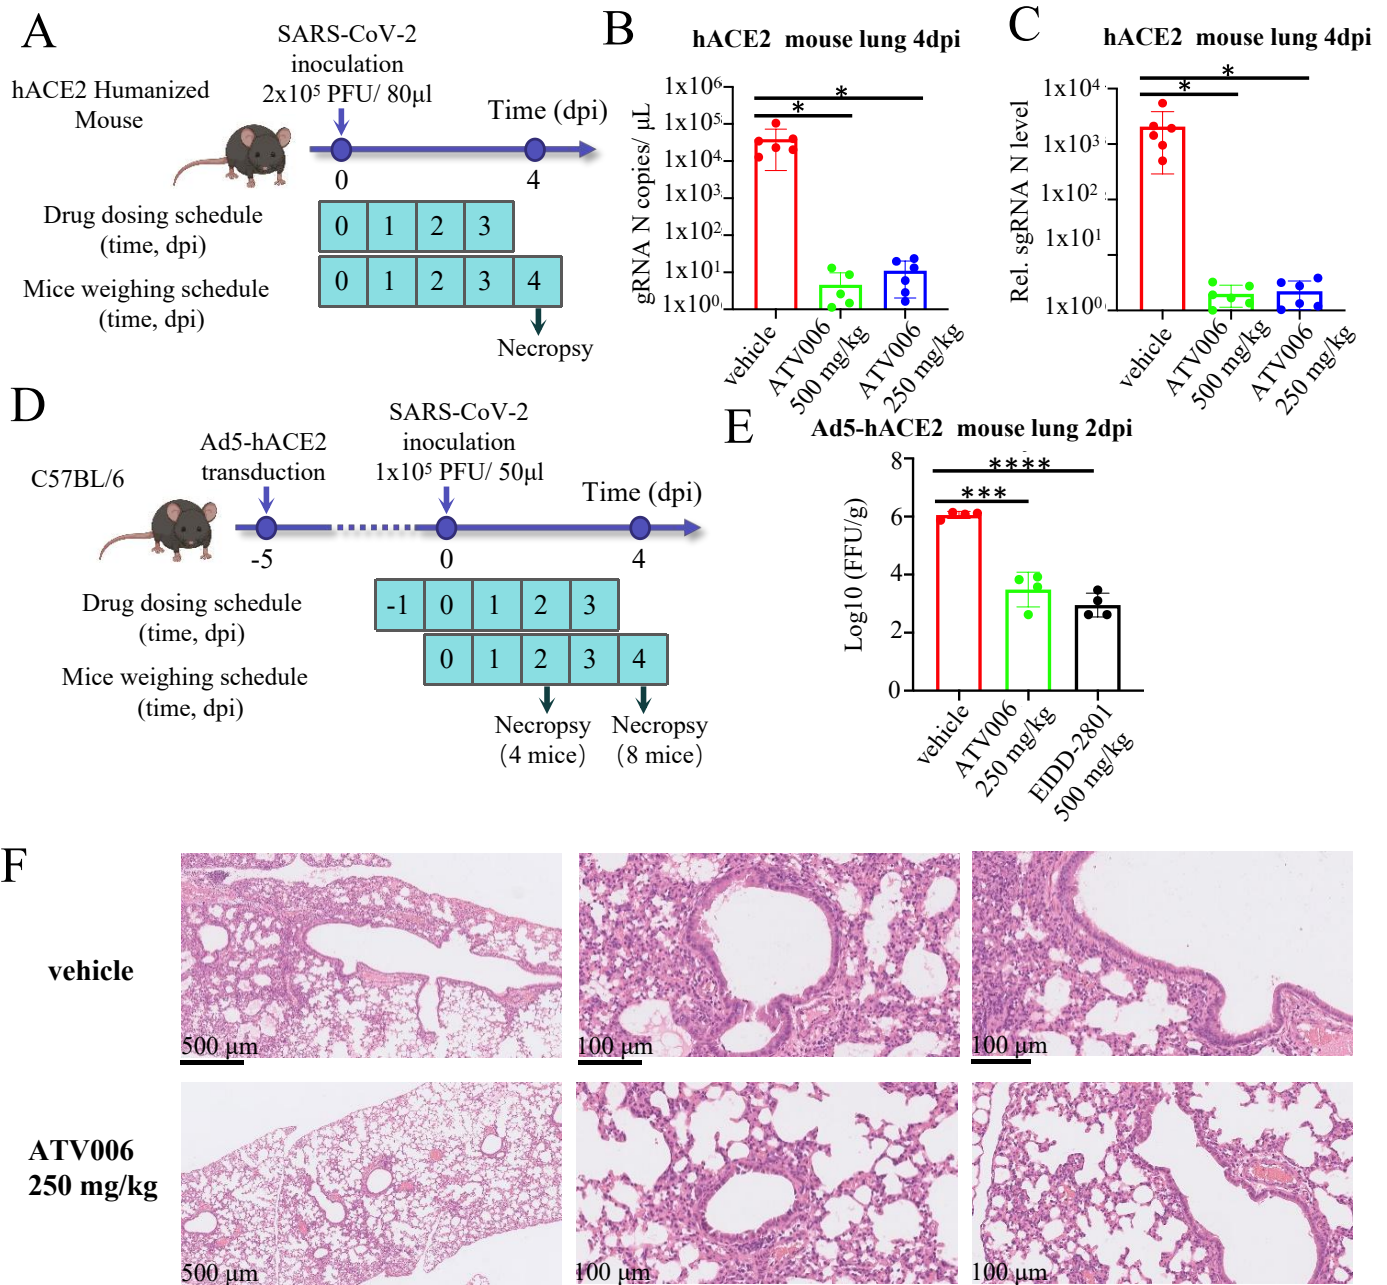



## Figure 5. Anti-SARS-CoV-2 Delta variant efficacy of ATV006 in K18 hACE2 mouse model.

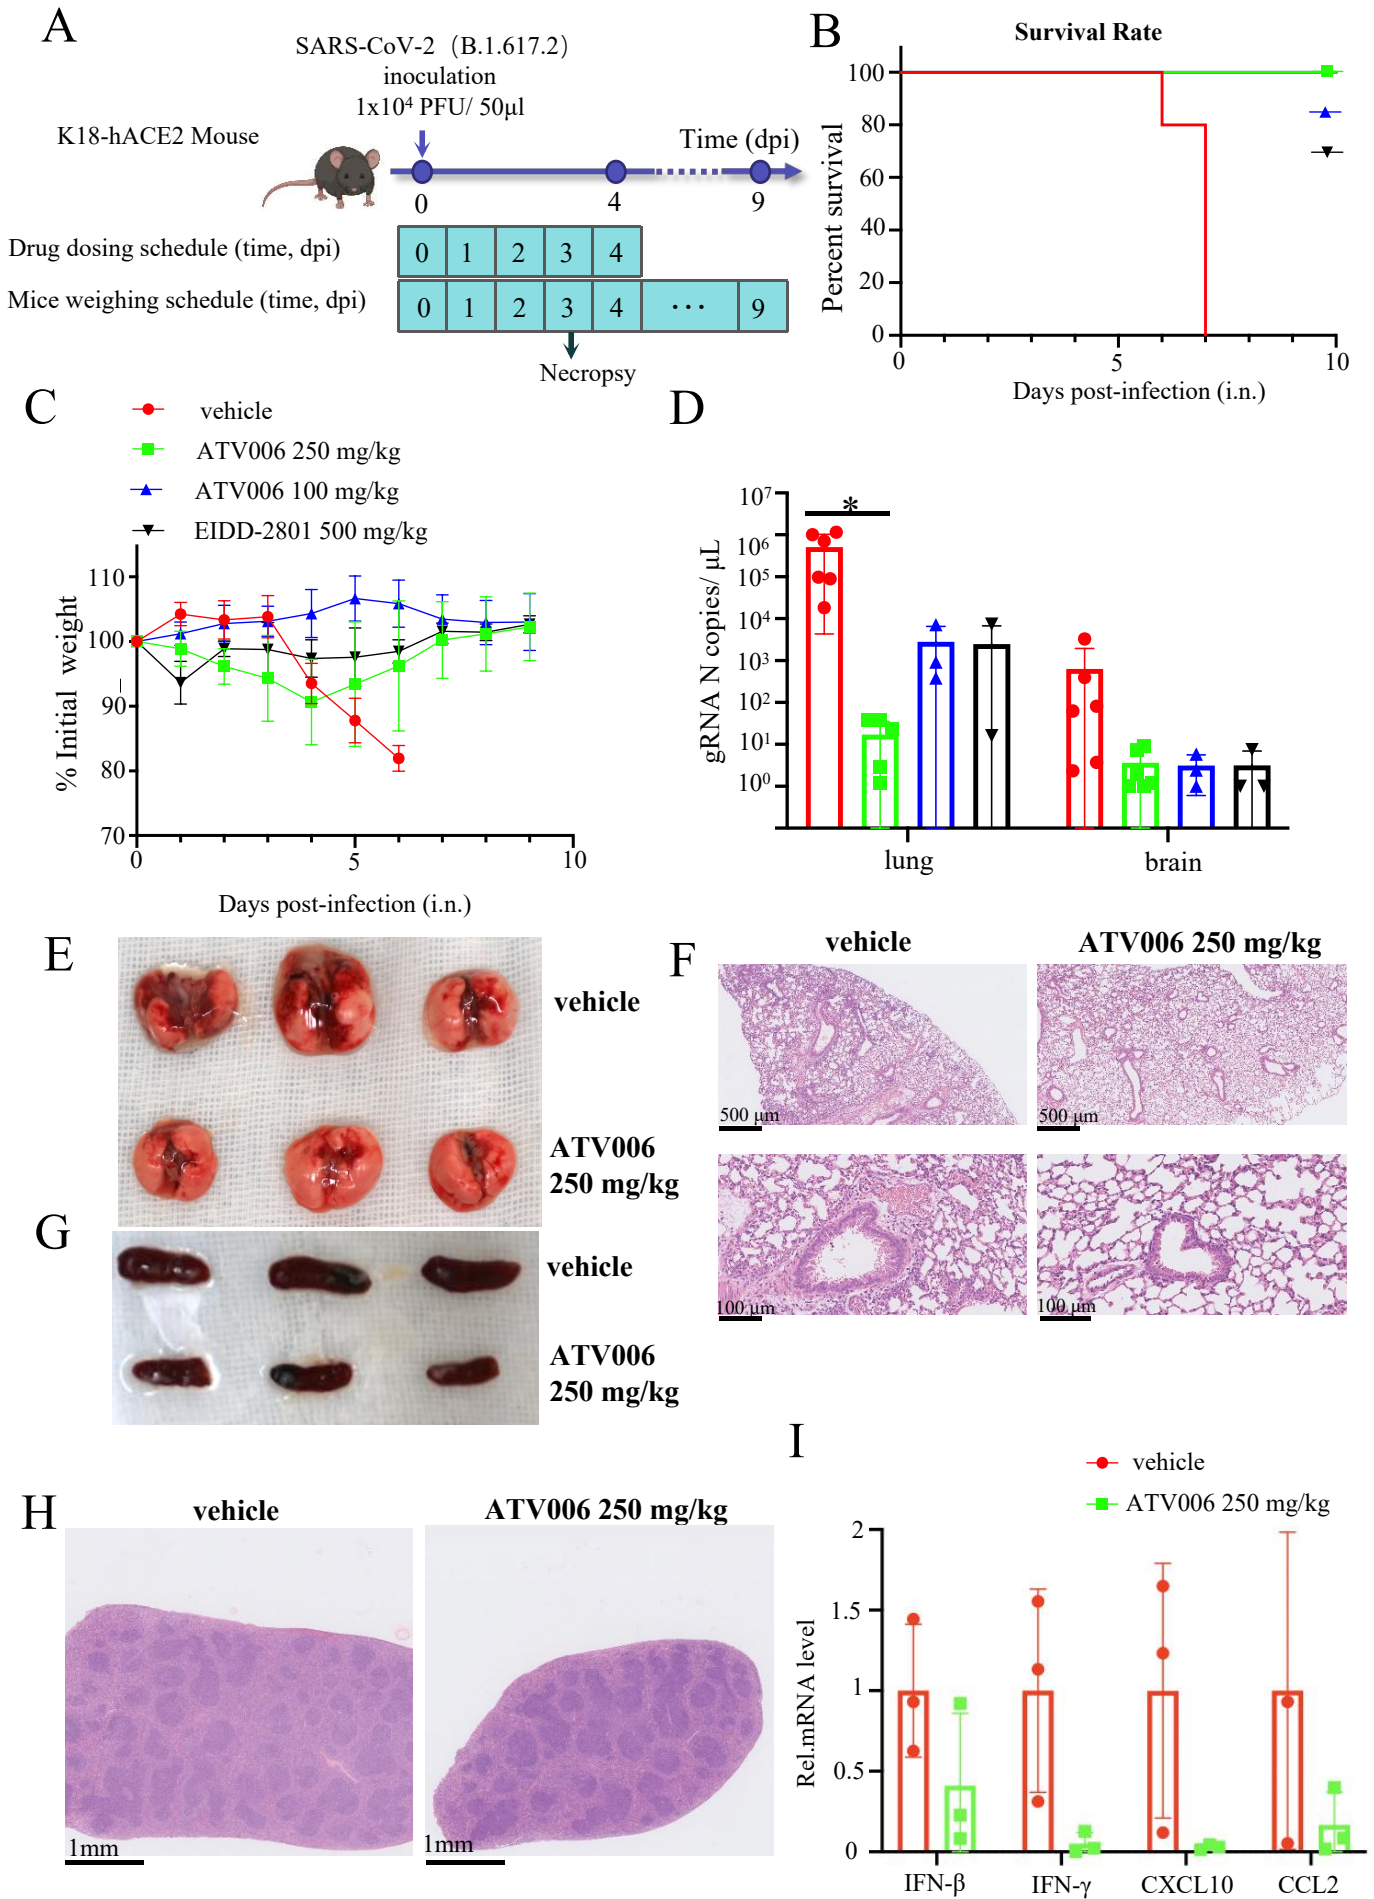

## Figure 6. ATV006 has broad-spectrum antiviral activity among different coronaviruses.

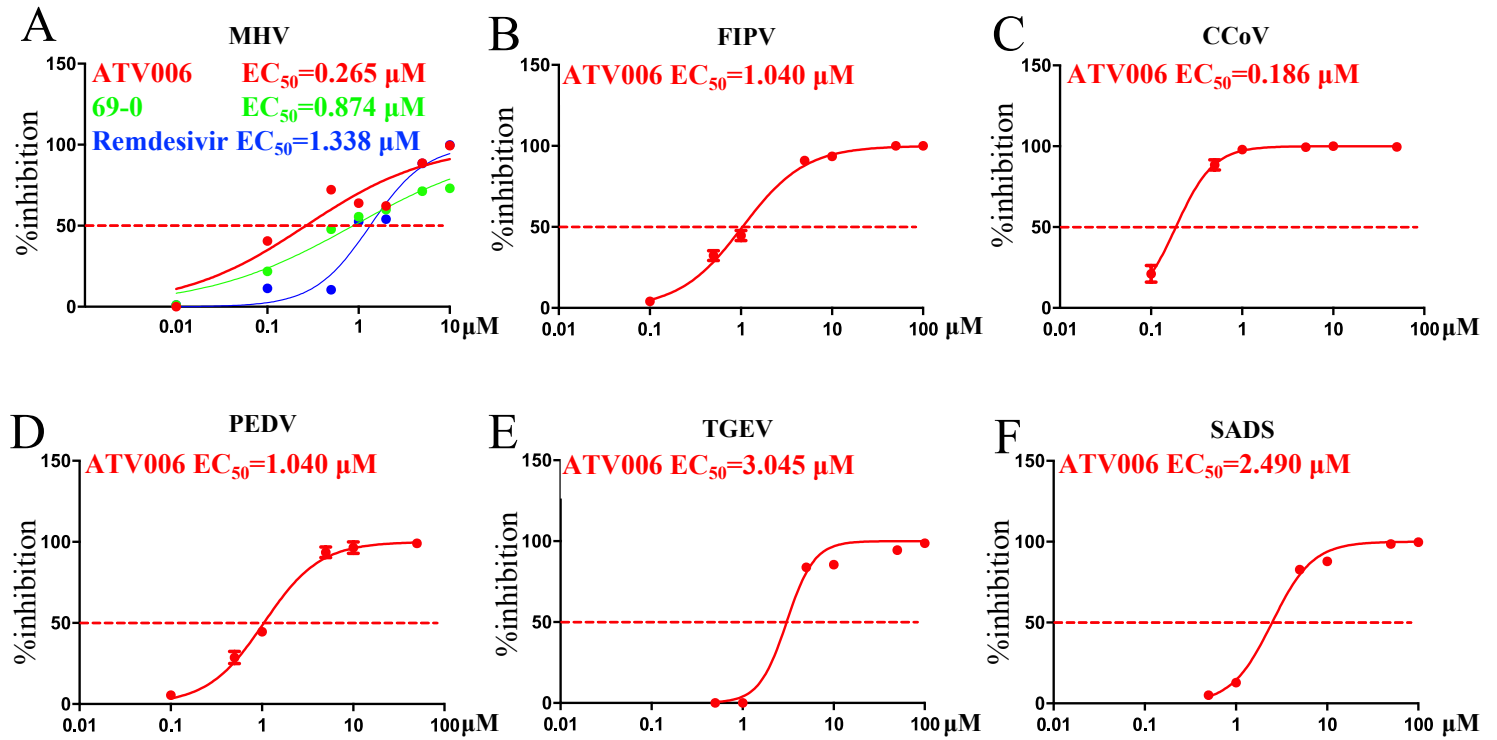

## Figure 7. Anti-viral efficacy of ATV006 against MHV *in vivo*.

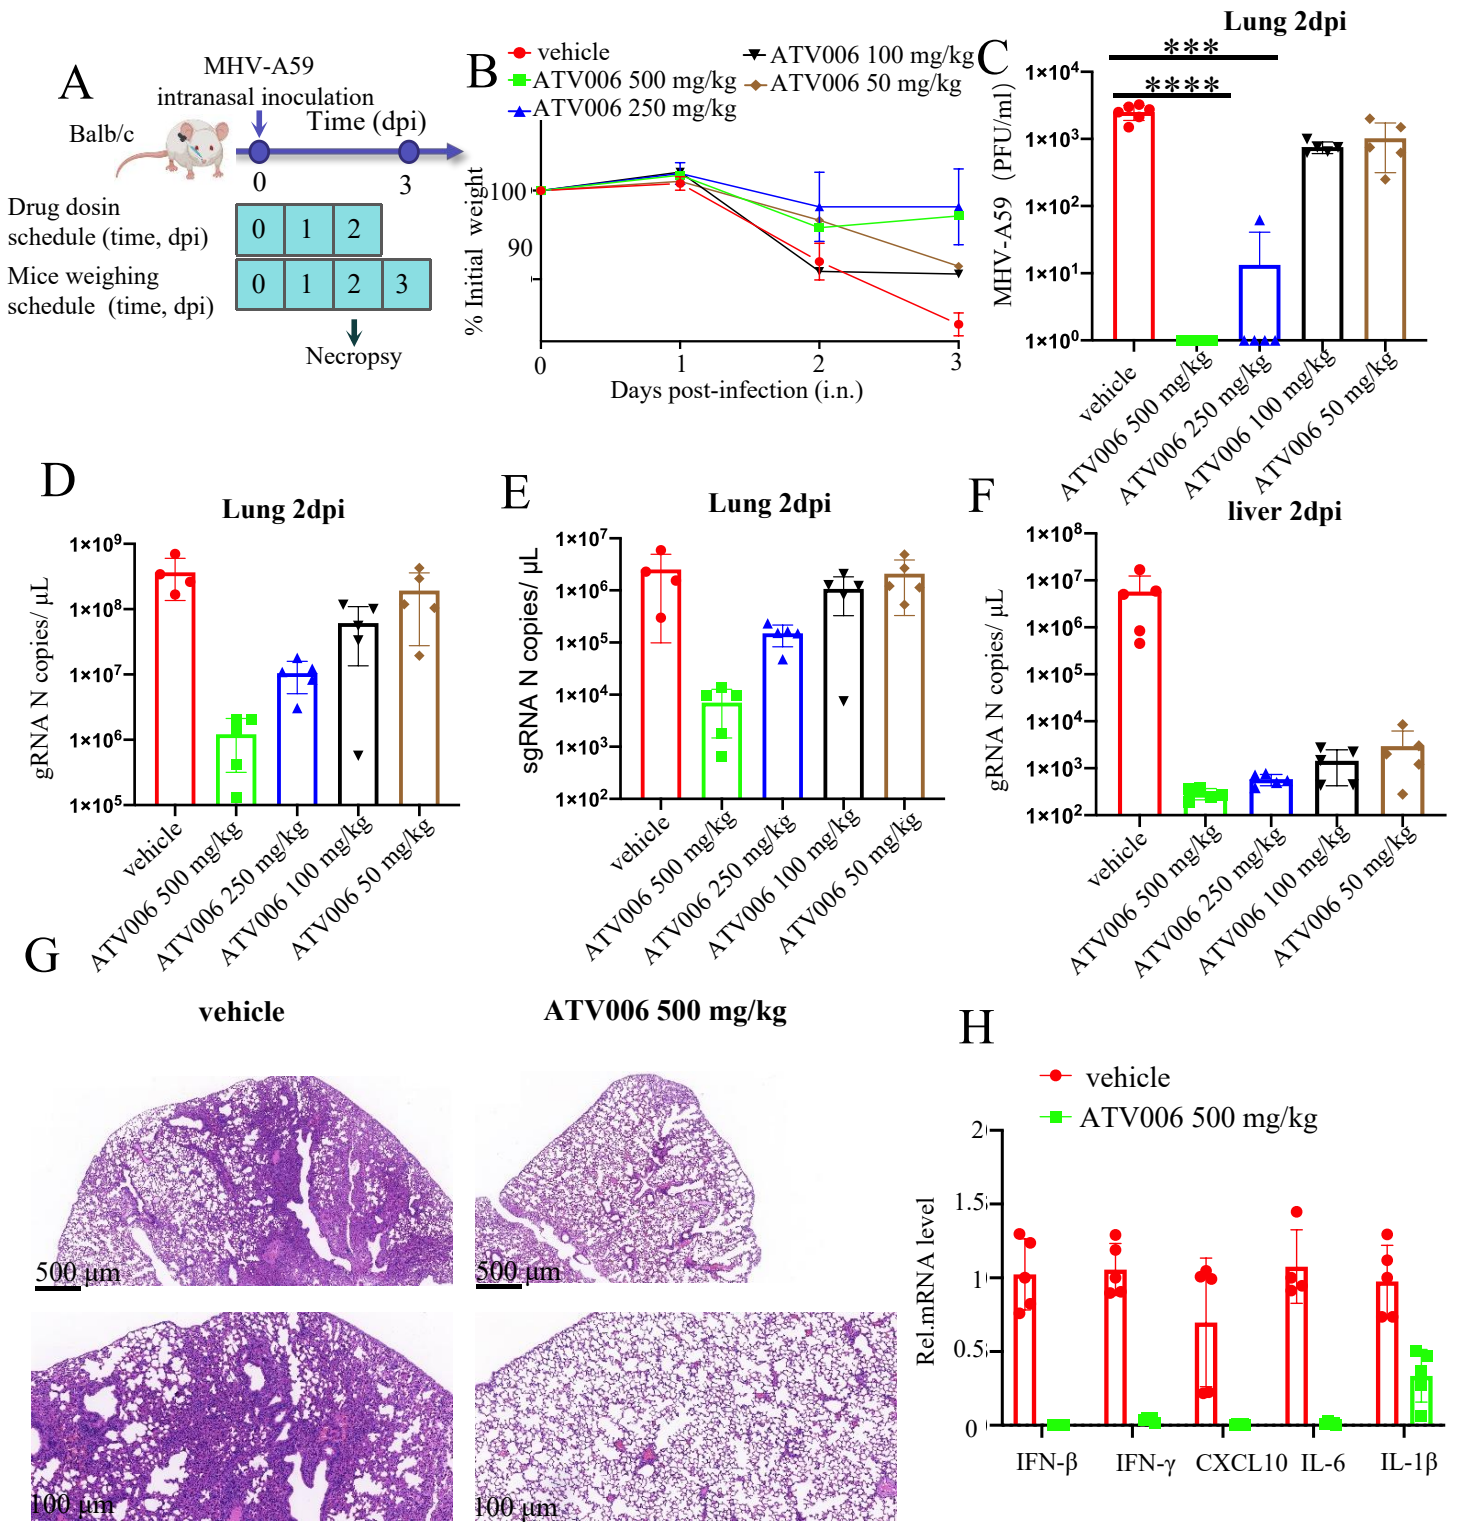

Source: https://www.biorxiv.org/content/biorxiv/early/2021/10/14/2021.10.13.463130.full.pdf
